1  
2  
3  
4  
5  
6  
7  
8  
9  
10  
11  
12  
13  
14  
15  
16  
17  
18  
19  
20  
21  
22  
23  
24  
25  
26  
27  
28  
29  
30  
31  
32  
33

## A developmental transition in the sensory coding of limb kinematics in primary motor cortex

Ryan M. Glanz<sup>†1</sup>, James C. Dooley<sup>1,3</sup>, Greta Sokoloff<sup>1,3,4</sup>, and Mark S. Blumberg<sup>†‡1-4</sup>

<sup>1</sup>Department of Psychological & Brain Sciences,  
University of Iowa, Iowa City, IA 52242, USA

<sup>2</sup>Interdisciplinary Graduate Program in Neuroscience,  
University of Iowa, Iowa City, IA 52245, USA

<sup>3</sup>DeLTA Center, University of Iowa, Iowa City, IA 52242, USA

<sup>4</sup>Iowa Neuroscience Institute, University of Iowa, Iowa City, IA 52242, USA

<sup>†</sup>Corresponding authors: Mark S. Blumberg, Ph.D. ([mark-blumberg@uiowa.edu](mailto:mark-blumberg@uiowa.edu))  
Ryan M. Glanz ([ryan-glanz@uiowa.edu](mailto:ryan-glanz@uiowa.edu))

<sup>‡</sup>Lead Contact: Mark S. Blumberg

**Short title:** Sensory coding of limb kinematics in developing primary motor cortex

Keywords: Development, sensorimotor, REM sleep, active sleep, myoclonic twitching, kinematics, sparse coding, rat

## 34 **Abstract**

35 Primary motor cortex (M1) undergoes protracted development in mammals, functioning initially  
36 as a sensory structure. Throughout the first postnatal week in rats, M1 is strongly activated by  
37 self-generated forelimb movements—especially by the twitches that occur during active sleep.  
38 Here, we quantify the kinematic features of forelimb movements to reveal receptive-field  
39 properties of individual units within the forelimb region of M1. At postnatal day (P) 8, nearly all  
40 units were strongly modulated by movement amplitude, especially during active sleep. By P12,  
41 only a minority of units continued to exhibit amplitude-tuning, regardless of behavioral state. At  
42 both ages, movement direction also modulated M1 activity, though to a lesser extent. Finally, at  
43 P12, M1 population-level activity became more sparse and decorrelated, along with a substantial  
44 alteration in the statistical distribution of M1 responses to limb movements. These findings reveal  
45 a transition toward a more complex and informationally rich representation of movement long  
46 before M1 develops its motor functionality.

47

## 48 **Introduction**

49 Despite its name, primary motor cortex (M1) is increasingly appreciated as an integrator of  
50 sensory input [1,2]. The sensory-processing capabilities of M1 are especially evident in early  
51 development before it plays any role in the production of movement. At such ages, M1 functions  
52 exclusively as a prototypical sensory structure [3-5], with M1 activity increasing after—not  
53 before—movements have been generated, indicative of reafference [3,4,6]. M1's motor  
54 capabilities, on the other hand, emerge gradually: Electrical stimulation of M1 does not reliably  
55 produce movement until postnatal days (P) 25–30 [7], and the precise age at which M1 activity  
56 begins to precede self-generated movements remains unknown. Before P25, self-generated  
57 movements are produced exclusively by brainstem structures, including the red nucleus [8,9].  
58 Based in part on the somatotopic alignment between M1's early sensory map and its later motor  
59 map, it seems clear that the former provides a structural foundation for the latter [4]. This structural  
60 foundation may subsequently serve as a “ground truth” reference by which emerging motor  
61 outflow is directed to its correct efferent target.

62 In early development, reafferent activation of M1 neurons is modulated by behavioral state.  
63 Reafference arising from myoclonic twitches—the jerky movements of the limbs and whiskers  
64 that occur abundantly during active sleep—robustly and reliably triggers M1 activity, whereas  
65 sustained bouts of wake movements result in only weak activation [3,4,6]. Because myoclonic  
66 twitches are brief, discrete events that occur against a background of muscle atonia, they are  
67 well-positioned to convey high-fidelity proprioceptive information to M1. By comparison, limb  
68 movements during wake are more sustained than twitches and typically involve the simultaneous  
69 engagement of multiple muscle groups within and across limbs. As demonstrated with the  
70 forelimbs in P8 rats, reafferent activity during wake is inhibited early in the processing stream at  
71 the level of the external cuneate nucleus [4,6], perhaps to prevent a saturated reafferent signal  
72 from muddying downstream sensory representations that are still developing. Given these unique  
73 features of twitching and the fact that cortical development is an activity-dependent process [10-  
74 12], we have proposed that twitches help to establish and refine M1's somatotopically precise  
75 sensory map [4].

76 In adult monkeys, activity in M1 is correlated with the amplitude of the movements that it produces  
77 [13]. In infant rats, activity in primary somatosensory cortex (S1) is similarly correlated with the  
78 amplitude of whisker movements: Specifically, we recently reported in P5 rats that high-amplitude  
79 whisker movements reliably trigger greater activation of S1 barrel cortex than low-amplitude  
80 whisker movements [14]. Building on the notion that M1 initially functions as a canonical sensory

81 structure, we predicted that it should also exhibit evidence of amplitude-dependent sensory  
82 coding. To test this prediction, we utilized recent advances in machine vision tools (DeepLabCut;  
83 [15,16]) to track the trajectory of limb movements while simultaneously recording extracellular  
84 activity in the forelimb region of M1. As predicted, we demonstrate that M1 activity at P8 is robustly  
85 tuned to the amplitude of forelimb movements during active sleep, but not wake. Moreover, nearly  
86 all M1 units share similar amplitude-tuning curves, leading to a repetitive—and thus, redundant—  
87 coding of movement amplitude at P8. In contrast, at P12, only a minority of M1 units continue to  
88 exhibit amplitude-tuning, regardless of sleep-wake state. M1 units also exhibit sensitivity to  
89 movement direction at both ages, although this feature of M1 tuning is less robust than that of  
90 amplitude. “Background” neural activity (occurring during periods of behavioral quiescence)  
91 increases dramatically over this period, marking a key transition from discontinuous to continuous  
92 activity. This transition is also characterized by increased sparsity and entropy across units,  
93 suggesting that M1 activity at P12 carries more informational content. Indeed, redundant “all-or-  
94 nothing” responses across M1 units, triggered by forelimb movements, are common at P8, and  
95 become increasingly rare at P12, further increasing the informational content embedded within  
96 M1 activity. All together, these results highlight multiple transitional features in M1’s  
97 developmental cascade from an exclusively sensory structure to one that will ultimately integrate  
98 sensorimotor information to organize motor outflow and support motor learning [17,18].

99

## 100 Results

101 To characterize the relationship between movement kinematics and M1 activity, we tracked  
102 forelimb movements in three dimensions for one hour using two high-speed (100 frames/s)  
103 cameras oriented perpendicularly to each other (Fig 1A). At the same time, we performed  
104 extracellular recordings in the contralateral forelimb region of M1 (Fig 1B–C). Because preliminary  
105 analyses indicated similar results for single- and multi-units, all units were analyzed together. Fig  
106 1D depicts representative behavioral and electrophysiological data collected at each age; most  
107 striking is the transition from discontinuous to continuous unit activity from P8 to P12.

108 The trajectory of forelimb movements was quantified using DeepLabCut (DLC), a machine-vision  
109 tool for behavioral analysis [15,16]. Movement amplitude of the forelimb was aggregated across  
110 three dimensions before analysis (Fig 2A). The amplitude of forelimb twitches was exponentially  
111 distributed at P8 and P12, with small twitches being more frequent than large twitches (Fig 2B).  
112 In contrast, the amplitude of wake movements followed a positively skewed normal distribution.  
113 Whereas small forelimb movements resulted primarily in displacement of the distal forelimb (i.e.,  
114 wrist and digits; S1A Fig), large forelimb movements resulted in greater displacement of the  
115 proximal forelimb (i.e., forearm and elbow). Finally, movement velocity and acceleration were  
116 highly correlated with movement amplitude and thus were not analyzed further (S1B Fig).

117 Because the pup’s limbs dangled freely in our testing environment, forelimb twitches traveled in  
118 a pendular motion that was skewed heavily in the positive y-dimension (see S1C–D Fig). As a  
119 consequence, displacement in the y-dimension did not provide unique information about  
120 movement direction. Therefore, we confined our directional analyses to movements in the x- and  
121 z-dimensions (anterior-posterior and medial-lateral, respectively; Fig 2C).

122 Forelimb twitches occurred in all directions relative to the limb’s resting position (Fig 2D) but were  
123 most likely to travel anteriorly at P8 and anteriorly and medially at P12. Movement direction could  
124 not be assessed accurately for wake movements because such movements are typically  
125 produced in rapid succession with many direction changes.

126

A

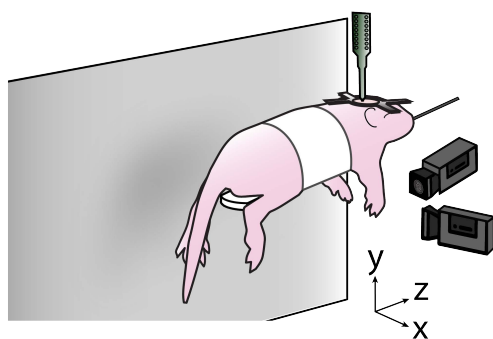

B

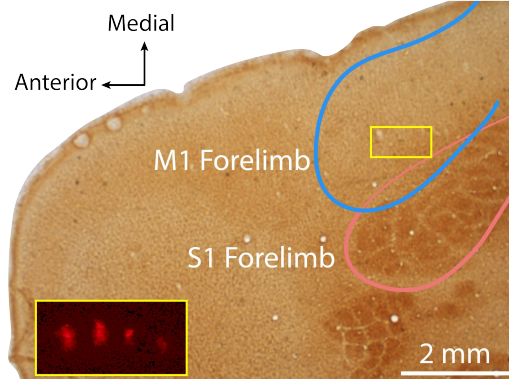

C

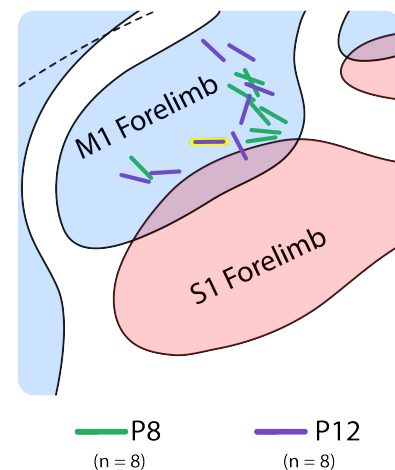

D

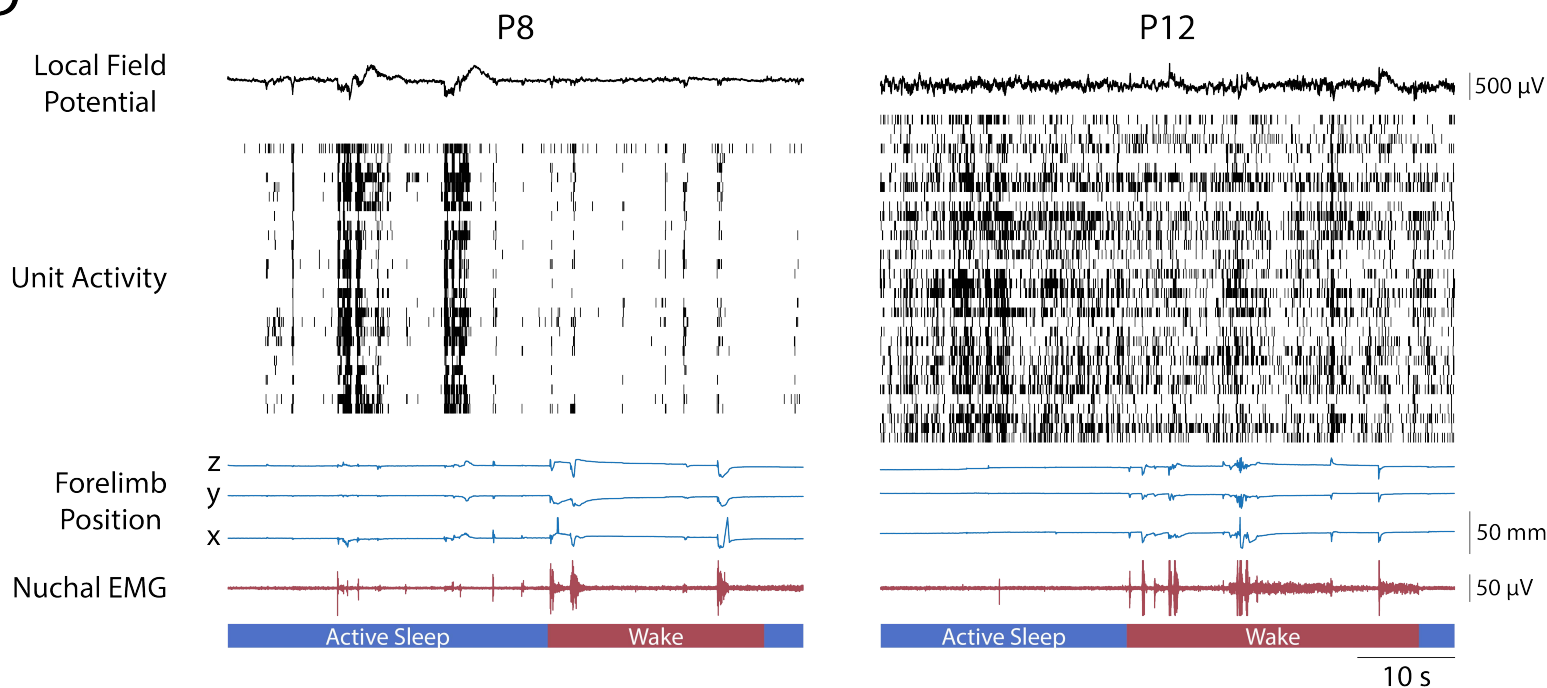

**Fig 1. Experimental setup, histology, and representative data.** (A) P8 and P12 rats were head-fixed with their torso supported and their limbs free to dangle. Two cameras were placed perpendicularly: One front-view camera captured the x-dimension (medial-lateral) of right forelimb movements, and one side-view camera captured the y-dimension (dorsal-ventral) and z-dimension (anterior-posterior). A 4x4 silicon depth electrode was lowered into the forelimb region of contralateral M1 to record extracellular activity. (B) Photomicrograph of electrode placement in M1. Cortical tissue was flattened before sectioning, followed by staining with cytochrome-oxidase to reveal the primary somatosensory cortical representations. The M1 and S1 forelimb boundaries are depicted as blue and pink lines, respectively. The yellow box in the M1 forelimb region delineates the location of the four-shank electrode for this pup. Inset: magnified view of the four-shank electrode revealed using fluorescence. (C) Electrode placements for the eight subjects at P8 and P12 represented as green and purple lines, respectively. The location of the electrode in (B) is shown with a yellow border. (D) Representative data from a P8 (left) and P12 (right) rat. From top to bottom: the local field potential (LFP) in M1; single- and multi-unit activity in M1, with each row denoting a different single-unit or multi-unit and each vertical tick denoting an action potential; traces of right forelimb position in the x-, y-, and z-dimensions; nuchal EMG activity; and active sleep (blue bars) and wake (red bars).

A

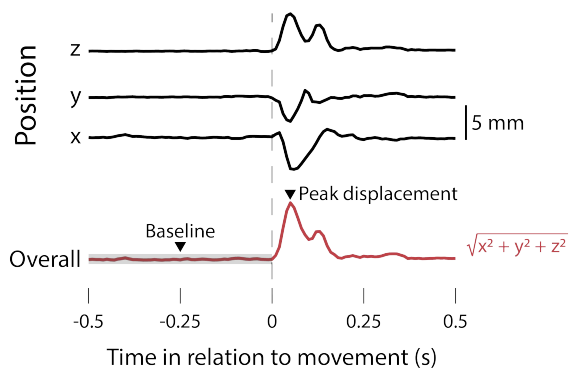

B

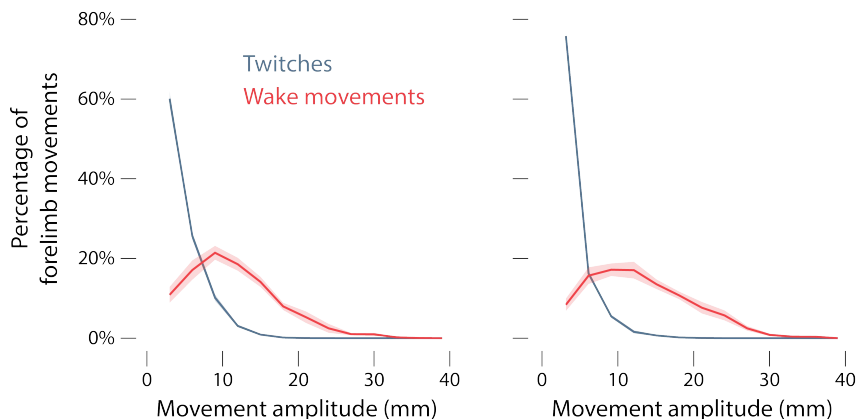

C

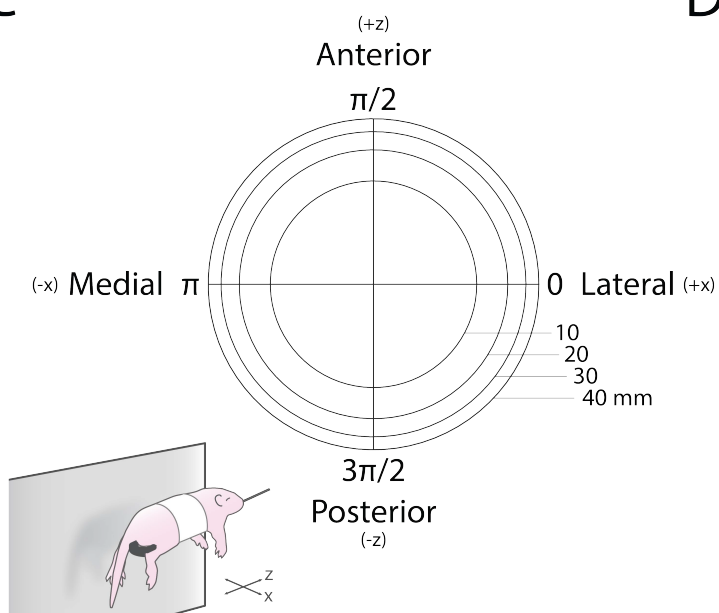

D

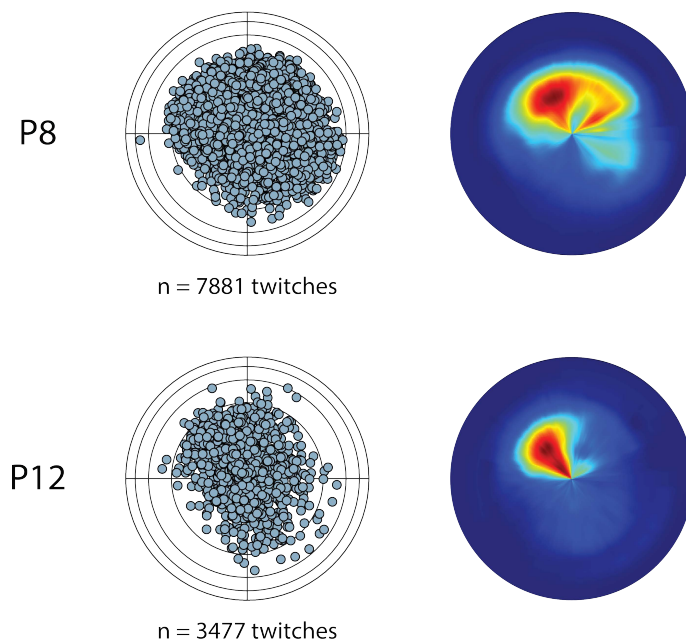

**Fig 2. Kinematics of forelimb movements across behavioral state.** (A) Depiction of how forelimb movement amplitude was calculated. For each detected twitch and wake movement, the position across the x-, y-, and z-dimensions was summed using the Pythagorean theorem. Movement amplitude was defined as the difference between the peak position of the forelimb 0–250 ms after a movement and the median position of the forelimb at baseline (i.e., -0.5 to 0 s before a movement). (B) Mean ( $\pm$ SEM) of the percentage of forelimb twitches (blue) and wake movements (red) as a function of amplitude at P8 (left) and P12 (right). (C) Two-dimensional representation of twitch direction in polar space. The x-dimension (medial-lateral) and the z-dimension (anterior-posterior) are shown. (D) Left: Scatterplot showing the position of the right forelimb at peak twitch displacement for all twitches at P8 (top) and P12 (bottom). Right: Heatmap showing the most common position of the right forelimb at peak twitch displacement for all twitches at P8 and P12. See also S1 and S2 Figs.

## 127 **M1 activity is strongly modulated by behavioral state**

128 Over the 60-min recording periods, P8 and P12 rats spent  $57.4 \pm 3.2\%$  and  $44.8 \pm 7.6\%$  of the  
129 time in active sleep, respectively ( $t(14) = 1.51$ ,  $p = .153$ , adj.  $\hat{\eta}^2 = .140$ ; S2A Fig). Twitches  
130 occurred significantly more frequently than wake movements at both ages (P8:  $F(1, 7) = 92.08$ ,  $p$   
131  $< .001$ , adj.  $\hat{\eta}^2 = .859$ ; P12:  $F(1, 7) = 7.11$ ,  $p = .018$ , adj.  $\hat{\eta}^2 = .289$ ; S2B Fig). The relative  
132 abundance of active sleep and twitches, especially at P8, provides ample opportunity for  
133 reafference from twitching limbs to drive M1 activity.

134 Consistent with previous reports [4,6], we found here at P8 that twitches drove relatively more M1  
135 activity than did wake movements (S2C Fig). This state-dependence in refferent activity was  
136 significant across age ( $F(1, 14) = 30.16$ ,  $p < .001$ , adj.  $\hat{\eta}_p^2 = .660$ ). Compared with previous studies  
137 that relied on EMG to detect movement [3,4,6], the use here of a video-based method  
138 substantially increased the number of twitches and wake movements that were detected. As a  
139 consequence, at P8 we now reliably detected more M1 activation in response to wake movements  
140 than previously reported [4,6]; nonetheless, refferent responses to twitches were still larger than  
141 they were to wake movements. Moreover, at both ages, twitches were significantly more likely  
142 than wake movements to trigger M1 activity (P8:  $F(1, 7) = 21.25$ ,  $p = .002$ , adj.  $\hat{\eta}^2 = .717$ ; P12:  
143  $F(1, 7) = 17.21$ ,  $p = .004$ , adj.  $\hat{\eta}^2 = .670$ ; S2D Fig).

## 144 **M1 units are tuned to movement amplitude at P8**

145 As mentioned above, we recently reported in P5 rats that whisker-movement amplitude reliably  
146 predicts activity in S1 barrel cortex [14]. Accordingly, we hypothesized here that M1 similarly  
147 codes for movement amplitude during the sensory stage of its development. To test this  
148 hypothesis, twitches and wake movements were sorted into amplitude bins from 0–16 mm.  
149 Amplitude bins were scaled logarithmically in increments from  $2^0$  to  $2^4$  mm to account for the  
150 exponential distribution of twitches. To avoid potential bias, equal numbers of anterior/posterior  
151 and medial/lateral movements were selected at random for these analyses.

152 At P8, twitches of increasing amplitude triggered increasing unit activation in M1 (Fig 3A). This  
153 amplitude-tuning was not observed for wake movements at P8, nor for twitches or wake  
154 movements at P12. Fig 3B quantifies the relationship between movement amplitude and *response*  
155 *strength*—the difference between the mean firing rate 0–250 ms after a movement and the mean  
156 baseline firing rate determined at -3 to -2 s before a movement. At P8, response strength  
157 significantly increased with respect to increasing twitch amplitude, but not wake-movement  
158 amplitude ( $F(1, 216) = 250.27$ ,  $p < .001$ , adj.  $\hat{\eta}^2 = .535$ ). This was not the case at P12 ( $F(1, 249)$   
159  $= 0.42$ ,  $p = .520$ , adj.  $\hat{\eta}^2 < .001$ ).

160 Although wake movements at P8, and all movements at P12, did not show a significant  
161 relationship with amplitude when averaged across units, it is still possible that some individual  
162 units were tuned to movement amplitude. To characterize the relationship between movement  
163 amplitude and response strength on a unit-by-unit basis, each unit's response strength was fit to  
164 a logarithmic model with respect to movement amplitude (Fig 3C). A logarithmic model was  
165 chosen based on the relationship between twitch amplitude and response strength observed at  
166 P8. Both the slope and the goodness-of-fit ( $r^2$ ) of the model were used to assess each unit's  
167 relationship with movement amplitude. In Fig 3D, the  $r^2$  value and slope of the model for each M1  
168 unit are shown. A minimum  $r^2$  value of .75 was chosen to consider an individual unit to be tuned  
169 to movement amplitude. At P8, the vast majority of M1 units showed positive tuning to amplitude,  
170 with  $r^2$  values greater than .75 and slopes that exceeded the 99% confidence interval of shuffled  
171 data. In contrast, for wake movements at P8 and all movements at P12, only a fraction of M1 units  
172 met these criteria, and some units even displayed negative relationships with amplitude (i.e.,  
173 negative tuning).

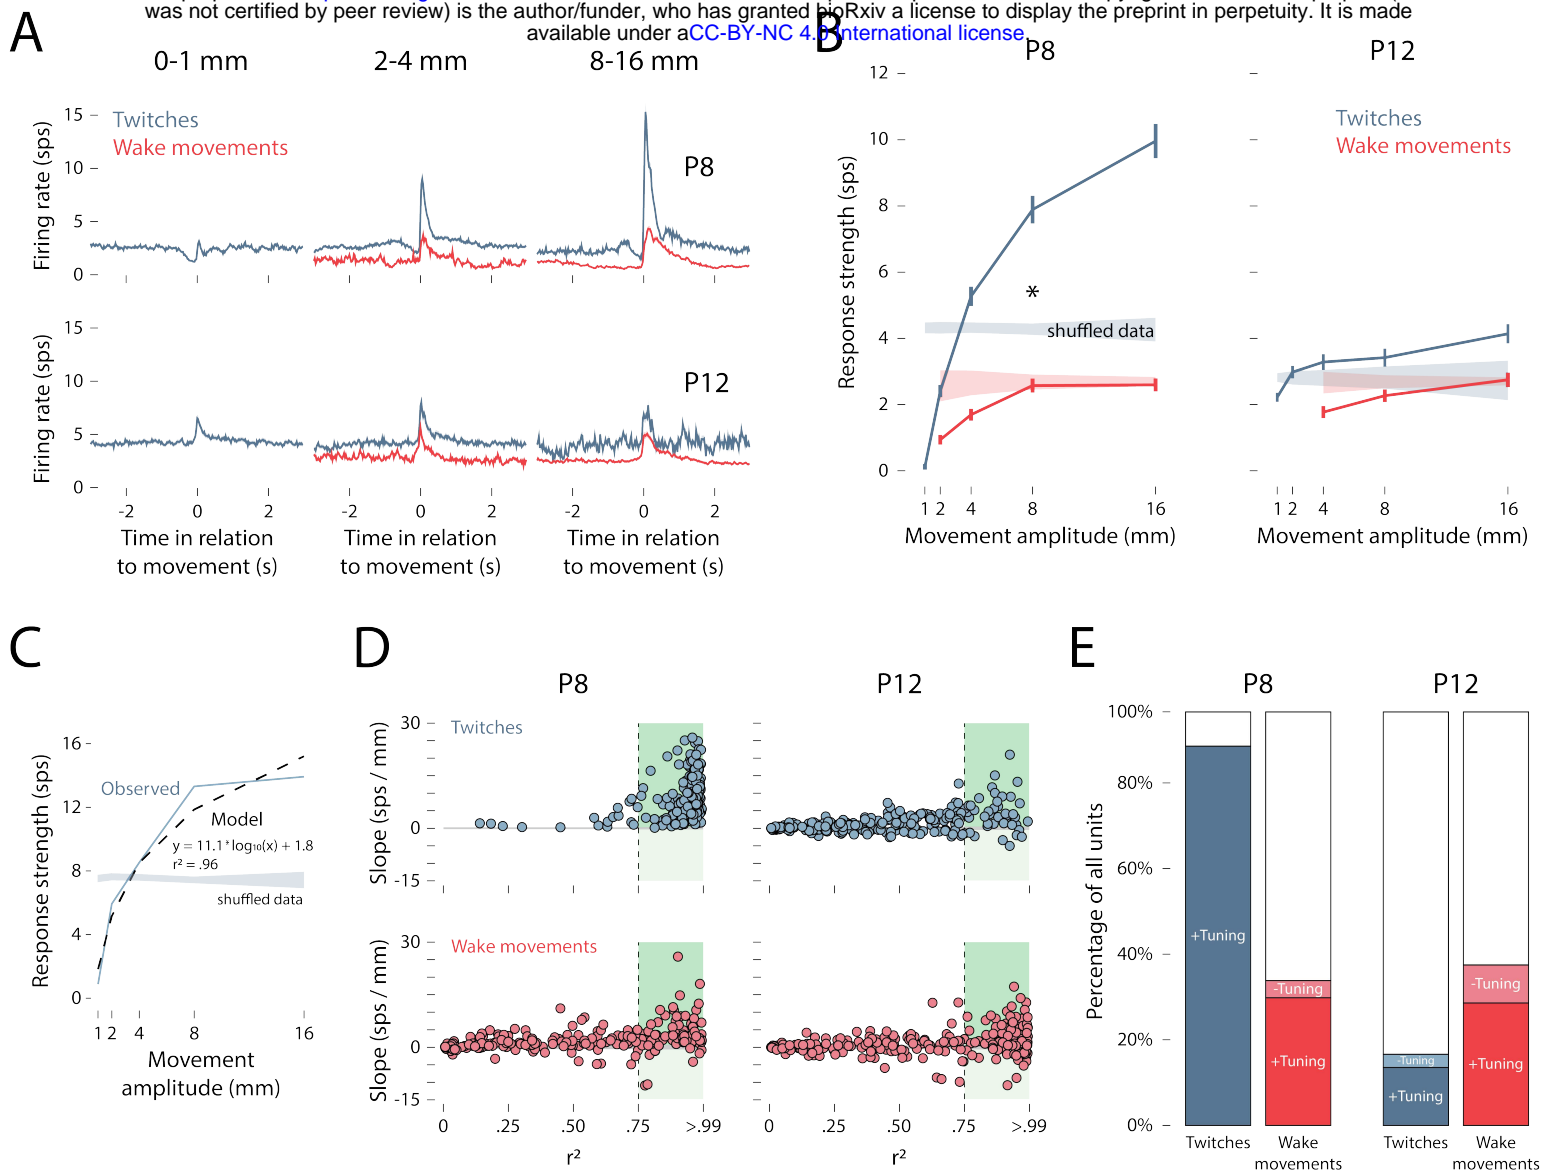

**Fig 3. Relationship between movement amplitude and M1 unit activity.** (A) Peristimulus time histograms of mean firing rate of M1 units in relation to the onset of twitches (blue) and wake movements (red) at P8 (top row) and P12 (bottom row). From left to right, the columns show small-amplitude (0–1 mm), medium-amplitude (2–4 mm), and large-amplitude (8–16 mm) forelimb movements. (B) Mean ( $\pm$ SEM) response strength ( $\Delta$ firing rate in relation to baseline) for twitches (blue) and wake movements (red) for all M1 units at P8 (left) and P12 (right). The right-edge of each amplitude bin is labeled on the x-axis. Color-coded shaded regions indicate 99% confidence intervals based on shuffled data. Asterisk indicates significant difference between twitches and wake movements at P8 ( $p < .05$ ). (C) Representative example of an individual M1 unit's relationship between response strength and movement amplitude at P8, and its fit to a logarithmic model. The observed data (blue solid line) and model data (black dashed line) are shown alongside the 99% confidence interval based on shuffled data (blue shaded region). The slope of the model (11.1 sps/mm) indicates the strength of the unit's relationship with movement amplitude, and the  $r^2$  value (.96) represents the goodness-of-fit to the logarithmic function. (D) Applying the method in (C) to all M1 units, the slope and  $r^2$  value for each unit is shown for twitches (blue) and wake movements (red) at P8 and P12. The gray-shaded horizontal lines represent the 99% confidence intervals based on shuffled data, and the dashed vertical lines represent an  $r^2$  threshold of .75. The shaded green regions to the right of the .75 threshold show units that are positively (slope  $> 0$ ) and negatively (slope  $< 0$ ) correlated with movement amplitude. (E) Based on the  $r^2$  threshold of .75 used in (D), stacked plots show the percentage of units at P8 and P12 that are positively tuned to movement amplitude for twitches (dark blue) and wake movements (dark red), negatively tuned for twitches (light blue) and wake movements (light red), or not tuned (white). See also S3 Fig.

174 As shown in the stacked plots in Fig 3E, nearly all M1 units at P8 exhibited a positive tuning to  
175 twitch amplitude (positive: 91.7%; negative: 0%); far fewer units exhibited amplitude-tuning to  
176 wake movements (positive: 30.9%; negative: 4.2%). At P12, relatively few units exhibited tuning  
177 to twitch amplitude (positive: 14.0%; negative: 3.2%) or wake-movement amplitude (positive:  
178 29.6%; negative: 9.2%). Finally, to confirm that these findings were not driven by an arbitrary  
179 selection of an  $r^2$  threshold of .75, we repeated these tests using thresholds of .50 and .90 and  
180 found the same pattern of results (S3A Fig).

181 When positively and negatively tuned units are considered separately, only twitches showed an  
182 age-related change in tuning strength: Small twitches (0–2 mm) at P12 were better able than  
183 small twitches at P8 to drive M1 activity ( $F(1.31, 291.02) = 10.01$ ,  $p = .001$ , adj.  $\hat{\eta}^2 = .039$ ; S3B  
184 Fig). In contrast, amplitude-tuning for wake movements did not change with age for either  
185 positively or negatively tuned units. When response strength was standardized (S3C Fig), M1  
186 units at P8 showed highly redundant responses to increasing twitch amplitude, but not wake-  
187 movement amplitude. At P12, M1 units did not show redundant responses to movement  
188 amplitude, regardless of sleep-wake state.

189 In summary, these findings extend previous reports [4,6] by showing that forelimb twitches in early  
190 development differentially trigger M1 activity across a range of movement amplitudes. This is the  
191 first demonstration of amplitude coding in infant M1 and is consistent with similar findings in S1  
192 barrel cortex [14].

### 193 **M1 units are sensitive to movement direction**

194 We next analyzed M1 activity as a function of twitch direction. (Because wake movements occur  
195 in prolonged bouts with multiple changes in direction, they could not be included in this analysis.)  
196 Twitch direction was analyzed separately along two dimensions: Anterior-posterior and medial-  
197 lateral (Fig 4A). Again, to avoid potential bias, we ensured that twitches in each direction had  
198 identical amplitude distributions. Twitches of the forelimb in each direction produced similar  
199 responses in M1 units at both P8 and P12 (Fig 4B). However, as shown in Fig 4C, the average  
200 response strength at P8 was significantly lower for anterior compared to posterior twitches ( $F(1,$   
201  $216) = 51.05$ ,  $p < .001$ , adj.  $\hat{\eta}^2 = .187$ ) and medial compared to lateral twitches ( $F(1, 216) = 53.75$ ,  
202  $p < .001$ , adj.  $\hat{\eta}^2 = .195$ ). At P12, there was a small but statistically significant difference in  
203 response strength between anterior and posterior twitches ( $F(1, 249) = 9.80$ ,  $p = .002$ , adj.  $\hat{\eta}^2 =$   
204  $.034$ ), but not between medial and lateral twitches ( $F(1, 249) = 0.28$ ,  $p = .599$ , adj.  $\hat{\eta}^2 < .001$ ).

205 Again, the trends in direction-related response strength, averaged across all units, may have  
206 obscured the direction-tuning of individual units. Accordingly, the direction-tuning of individual  
207 units was assessed by measuring the difference in response strength between anterior/posterior  
208 and medial/lateral twitches. At P8, individual units tended to be responsive to twitches that  
209 traveled posteriorly and laterally (Fig 4D). By P12, receptive fields were more uniformly distributed  
210 across all four direction combinations. Indeed, at P8, the majority of units were tuned to posterior  
211 rather than anterior movements (69.6% and 24.0%, respectively) and to lateral rather than medial  
212 movements (73.3% and 22.1%, respectively; Fig 4E). At P12, however, direction-tuning was more  
213 evenly distributed (range: 38.4–49.2%). Thus, as with amplitude tuning, there was an age-related  
214 reduction among M1 units in the redundancy of direction tuning.

### 215 **Sparse background activity emerges at P12**

216 Thus far, we have focused on the correlation between movement kinematics and the firing rate of  
217 individual units. However, the activity *across* units—that is, population spiking activity—also  
218 undergoes a marked developmental shift: Population activity shifts from discontinuous at P8 to  
219 continuous at P12 (Fig 5A). To characterize this change in population activity, we draw a  
220 distinction between movement-related activity—M1 activity occurring during and immediately



**A**

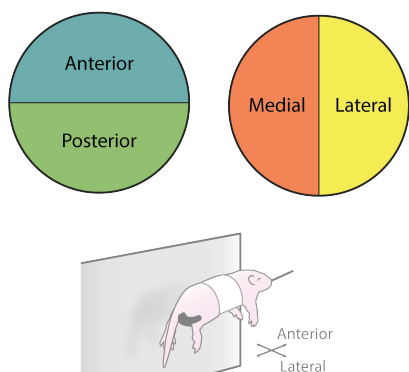

**B**

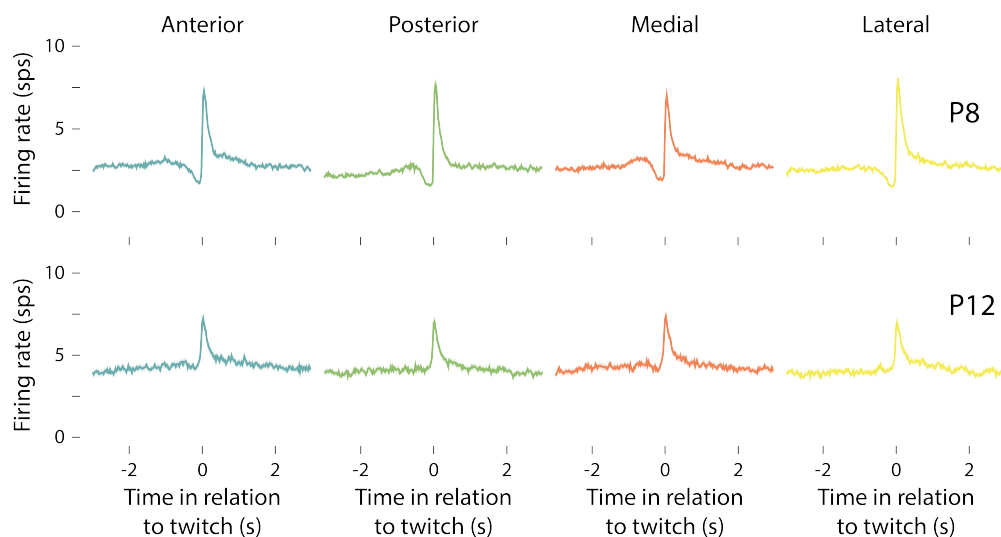

**C**

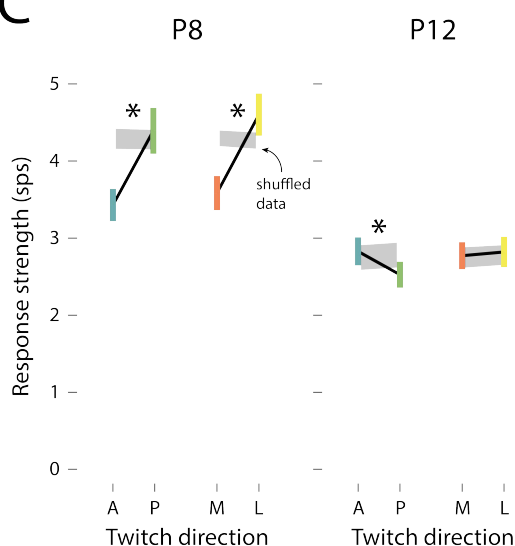

**D**

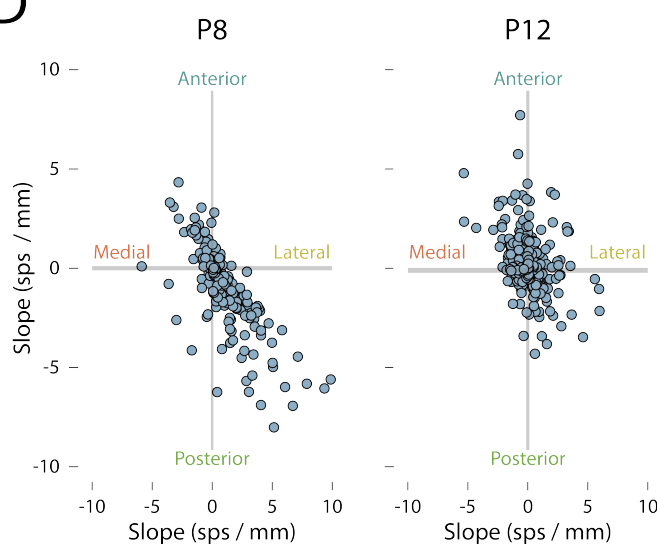

**E**

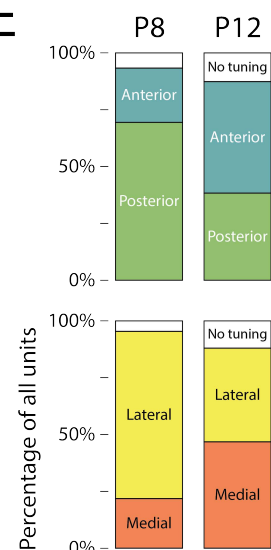

**Fig 4. Effect of movement direction on M1 unit activity.** (A) Individual forelimb twitches were classified as moving in anterior (blue), posterior (green), medial (orange), or lateral (yellow) directions. (B) Peristimulus time histograms of the mean ( $\pm$ SEM) firing rate of M1 units in relation to the onset time of (from left to right) anterior, posterior, medial, and lateral forelimb twitches at P8 (top) and P12 (bottom). (C) Mean ( $\pm$ SEM) response strength ( $\Delta$ firing rate in relation to baseline) for anterior (blue) and posterior (green) twitches, and for medial (orange) and lateral (yellow) twitches at P8 (left) and P12 (right). The gray shaded regions indicate 99% confidence intervals based on shuffled data. Asterisks indicate a significant difference between movement directions ( $p < .05$ ). (D) The slope (strength of the unit's relationship with movement direction) for individual units is represented along the medial-lateral (x) and anterior-posterior (y) axes. The gray shaded horizontal and vertical lines indicate 99% confidence intervals based on shuffled data. (E) Top row: Stacked plots show the percentage of units tuned to anterior (blue) or posterior (green) twitches at P8 and P12. Bottom row: Stacked plots show the percentage of units tuned to medial (orange) or lateral (yellow) twitches at P8 and P12. The white regions indicate untuned units.

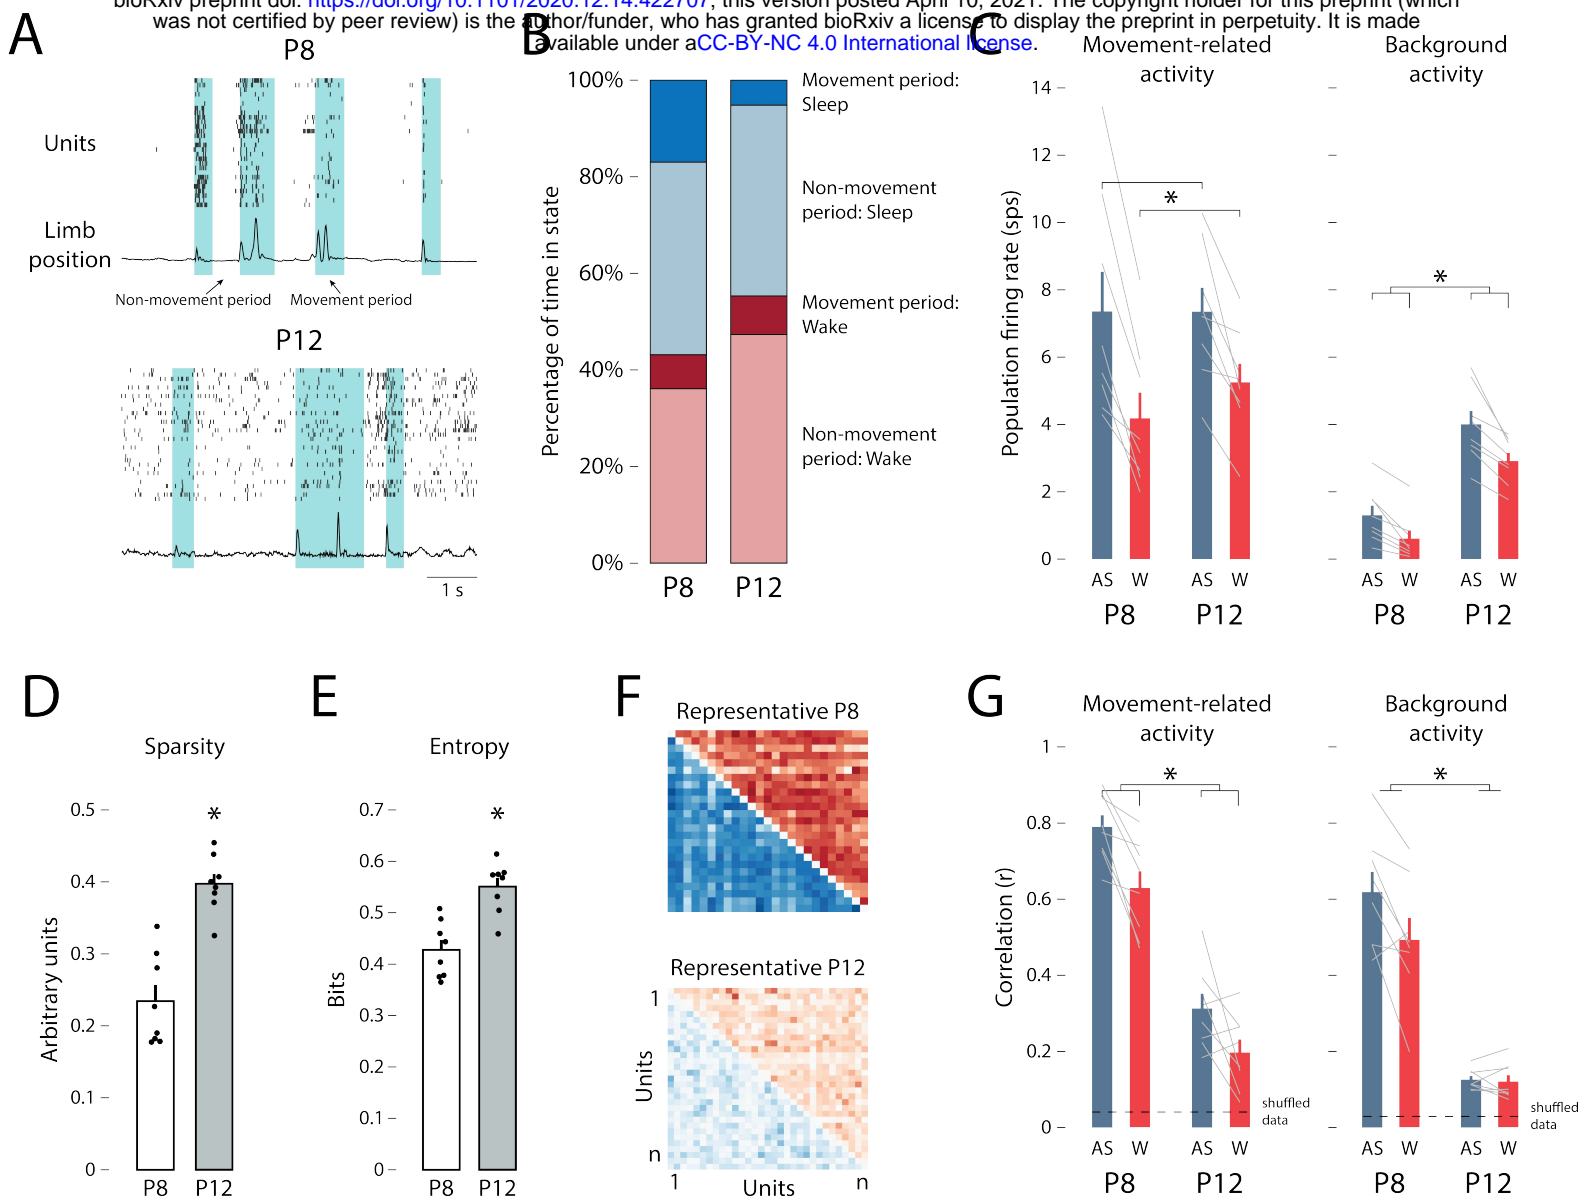

**Fig 5. Population spiking activity decorrelates between P8 and P12.** (A) Population spiking activity and limb position from a representative P8 (top) and P12 (bottom) rat are shown. A spike raster (each row represents one unit) and limb position trace (normalized) is shown for each pup. Green-shaded regions represent movement periods, and the unshaded regions represent non-movement periods. (B) The percentage of time spent in movement or non-movement periods (Movement period (sleep): blue; Non-movement period (sleep): light blue; Movement period (wake): red; Non-movement period (wake): light red) is shown for P8 (left) and P12 (right) animals. (C) Mean ( $\pm$ SEM) movement-related activity (left-hand plot) and background activity (right-hand plot) firing rate for active sleep (blue) and wake (red) for P8 (left) and P12 (right). Firing rates for each rat are shown as gray lines. Asterisks denote a significant main effect of behavioral state (left-hand plot;  $p < .05$ ) and significant main effects of behavioral state and age (right-hand plot;  $p < .05$ ). (D) Mean ( $\pm$ SEM) values of sparsity for P8 (white) and P12 (gray) rats. Black dots show the values for individual pups. Asterisk indicates significant difference between P8 and P12 ( $p < .05$ ). (E) Mean ( $\pm$ SEM) values of entropy for P8 (white) and P12 (gray) rats. Black dots show the values for individual pups. Asterisks indicates significant difference between P8 and P12 ( $p < .05$ ). (F) Representative correlation matrices for each unit-unit pair (x- and y-axes) for a P8 (top) and P12 (bottom) rat during movement periods. Blue squares indicate correlations during active sleep and red squares indicate correlations during wake. Darker colors denote higher  $r^2$  values. (G) Mean ( $\pm$ SEM) correlation coefficient ( $r$ ) during active sleep (blue) and wake (red) for P8 (left) and P12 (right) animals for movement-related activity (left-hand plot) and background activity (right-hand plot). Correlation coefficients for each rat are shown as gray lines. Dashed horizontal lines indicate 99% confidence interval based on shuffled data. Asterisks represent significant main effects of behavioral state and age (left-hand plot;  $p < .05$ ) and a significant main effect of age (right-hand plot;  $p < .05$ ).

221 after (i.e., within 250 ms) limb movements—and background activity—M1 activity occurring during  
222 periods in which limb movements are absent.

223 To characterize the change in population spiking activity between P8 and P12, we first  
224 characterized four periods during each recording session: (1) movement periods during active  
225 sleep (i.e., periods of twitches), (2) non-movement periods during active sleep, (3) movement  
226 periods during active wake (i.e., periods of wake movements) and, (4) non-movement periods  
227 during wake (Fig 5B). Pups at both ages spent a greater percentage of time in non-movement  
228 periods (P8: AS = 39.9%, W = 36.1%; P12: AS = 39.5%, W = 47.4%) than in movement periods  
229 (P8: AS = 17.0%, W = 7.0%; P12: AS = 5.2%, W = 8.0%). As shown in Fig 5C, movement-related  
230 population activity was significantly higher during active sleep than wake ( $F(1, 14) = 53.97$ ,  $p <$   
231  $.001$ , adj.  $\hat{\eta}_p^2 = .779$ ), and this state difference did not change between P8 and P12 ( $F(1, 14) =$   
232  $0.22$ ,  $p = .644$ , adj.  $\hat{\eta}_p^2 < .001$ ). Conversely, background population activity was not only higher  
233 during active sleep compared with wake ( $F(1, 14) = 47.31$ ,  $p < .001$ , adj.  $\hat{\eta}_p^2 = .756$ ), but exhibited  
234 a three- to four-fold increase between P8 and P12 ( $F(1, 14) = 39.21$ ,  $p < .001$ , adj.  $\hat{\eta}_p^2 = .718$ ).  
235 Thus, the increase in M1's population spiking activity between P8 and P12 occurred almost  
236 entirely during non-movement periods.

237 Next, we asked whether the patterning of M1 population activity changed between P8 and P12.  
238 We first measured the change in sparsity (the degree to which action potentials are uniformly  
239 distributed across time) and entropy (the informational capacity available given the patterning of  
240 activity) from P8 to P12. Importantly, sparsity and entropy interact to efficiently encode sensory  
241 features in cortical networks [19]. Indeed, across M1 units, both sparsity and entropy increased  
242 significantly between P8 and P12 (sparsity:  $t(10.89) = 5.97$ ,  $p < .001$ , adj.  $\hat{\eta}^2 = .744$ ; entropy:  $t(14)$   
243  $= 4.71$ ,  $p < .001$ , adj.  $\hat{\eta}^2 = .585$ ; Fig 5D–E).

244 To assess whether the increase in uniform background activity affected population dynamics in  
245 M1, we computed unit-by-unit correlations of activity during each of the four periods outlined  
246 above. Fig 5F shows correlation matrices for representative pups at P8 and P12 during active  
247 sleep (blue) and wake (red) movement periods. Movement-related activity, but not background  
248 activity, was significantly more correlated during active sleep than wake ( $F(1, 14) = 28.02$ ,  $p <$   
249  $.001$ , adj.  $\hat{\eta}_p^2 = .643$ ; Fig 5G). Moreover, movement-related activity was significantly less correlated  
250 at P12 than at P8 ( $F(1, 14) = 91.97$ ,  $p < .001$ , adj.  $\hat{\eta}_p^2 = .859$ ; Fig 5G), as was background activity  
251 ( $F(1, 14) = 53.41$ ,  $p < .001$ , adj.  $\hat{\eta}_p^2 = .777$ ). This decorrelation of population activity further  
252 indicates a transition toward sparse—and therefore less redundant—M1 activity at P12. Although  
253 population activity was significantly less correlated at P12, the observed correlations were still  
254 stronger than expected (i.e., compared with shuffled data). In other words, population spiking  
255 activity at P12 continued to exhibit an organized temporal structure.

256 Next, we sought to characterize the population-level activity of M1 units in response to forelimb  
257 movements. For each given movement, an M1 unit was considered “responsive” if its firing rate  
258 increased significantly (i.e., exceeded the 95% confidence interval) relative to its baseline firing  
259 rate. If this threshold was not reached, the M1 unit was considered “unresponsive” to that  
260 particular movement. For each limb movement, then, the percentage of responsive M1 units—  
261 the *population response*—was calculated (Fig 6A). Fig 6B plots the mean percentage of forelimb  
262 movements across pups (y-axis) that triggered a given population response (x-axis).

263 At P8, a plurality (20-30%) of forelimb movements during sleep and wake triggered only a small  
264 percentage of M1 units (Fig 6B, left). Also, twitches, but not wake movements, regularly triggered  
265 activity (~10% of responses) in nearly all M1 units. As a consequence, population responses at  
266 P8 followed a near-exponential distribution, with “all-or-nothing” responses occurring frequently—  
267 especially in response to forelimb twitches.

A

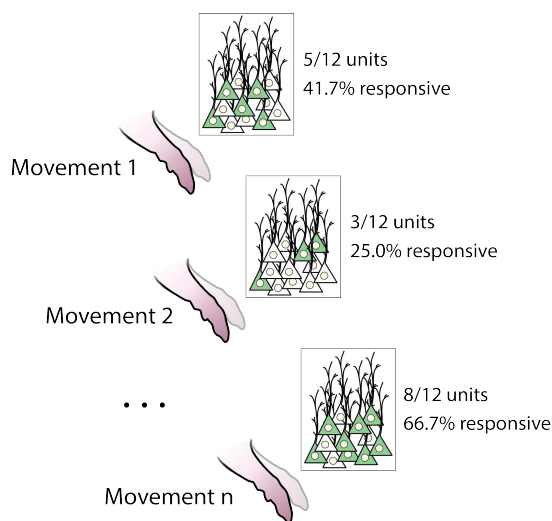

B

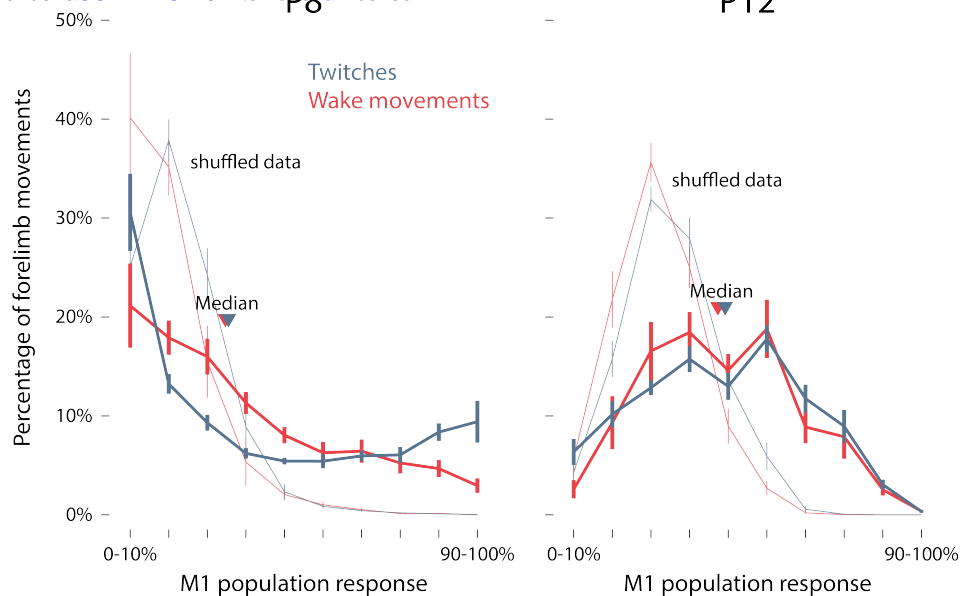

C

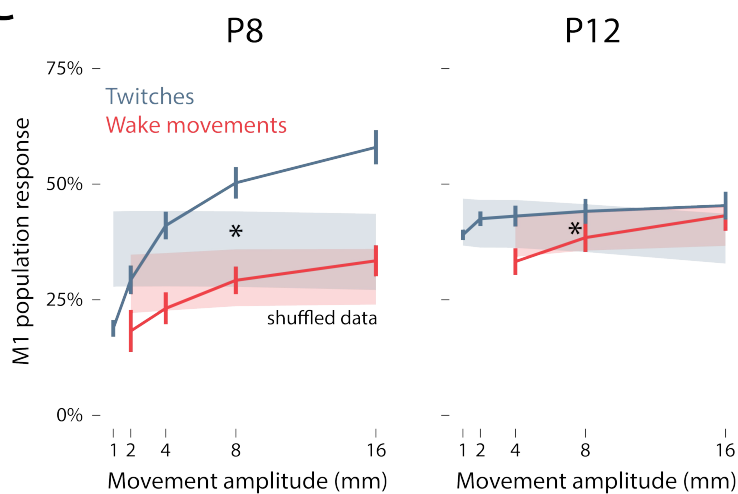

D

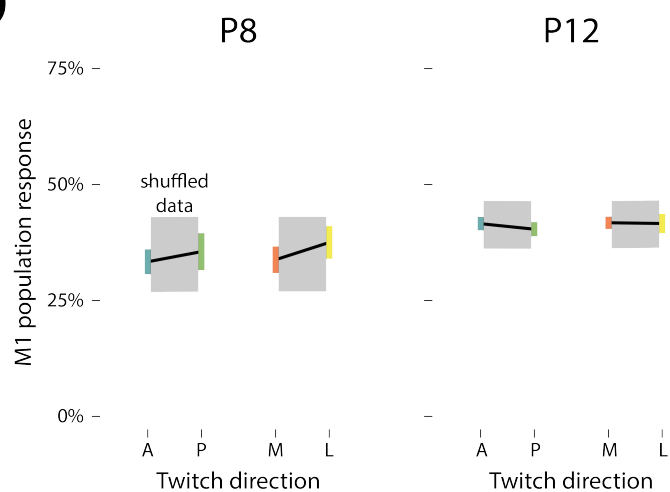

**Fig 6. Population responses in M1.** (A) Illustration of the relationship between forelimb movements (1 through n) and percentage of M1 units responding to a given movement (i.e., population response). (B) Mean ( $\pm$ SEM) percentage of twitches (blue) and wake movements (red) that yielded population responses of 0–10% to 90–100% at P8 (left) and P12 (right). Median values for twitches (blue arrows) and wake movements (red arrows) are also shown. Light blue and red lines indicate shuffled data for twitches and wake movements, respectively. (C) Mean ( $\pm$ SEM) population response for M1 units as a function of the amplitude of twitches (blue) and wake movements (red) at P8 (left) and P12 (right). Color-coded shaded regions represent 99% confidence intervals based on shuffled data. Asterisks indicates significant main effect of twitches versus wake movements ( $p < .05$ ). (D) Mean ( $\pm$ SEM) population response of M1 units for anterior (blue), posterior (green), medial (orange), and lateral (yellow) twitches at P8 (left) and P12 (right). Gray-shaded regions indicate 99% confidence intervals based on shuffled data.

268 At P12, the distributions of the population responses to twitches and wake movements changed  
269 substantially (Fig 6B, right). Overall, forelimb movements at this age tended to trigger activity in  
270 approximately half of the M1 units, resulting in a roughly normal distribution. Indeed, all eight of  
271 the P12 rats—but only two of the eight P8 rats—exhibited normal distributions of their population  
272 responses (see S4 table). Population responses were significantly larger for twitches than wake  
273 movements, but this effect was smaller than that of age (P8 vs. P12:  $F(3.51, 49.15) = 26.93$ ,  $p <$   
274  $.001$ , adj.  $\hat{\eta}_p^2 = .607$ ; AS vs. W:  $F(1, 14) = 4.63$ ,  $p = .049$ , adj.  $\hat{\eta}_p^2 = .194$ ). Furthermore, the  
275 distributions of population responses shifted as “all-or-nothing” responses (i.e.,  $<10\%$  or  $>90\%$  of  
276 units responding) decreased from 26.9% at P8 to just 1.4% at P12. In other words, M1 population  
277 responses became substantially less redundant by P12.

278 We next determined whether movement kinematics predict M1 population responses. As shown  
279 in Fig 6C, the population response increased significantly as a function of movement amplitude  
280 at both ages, but the state-dependence of this relationship was stronger at P8 ( $F(1, 7) = 22.06$ ,  $p$   
281  $< .001$ , adj.  $\hat{\eta}_p^2 = .571$ ) than at P12 ( $F(1, 7) = 9.37$ ,  $p = .008$ , adj.  $\hat{\eta}_p^2 = .357$ ). Overall, larger  
282 movements drove more activity within and across M1 units, especially during active sleep at P8.

283 In contrast with movement amplitude, twitch direction was not significantly related to population  
284 response at either age (anterior vs. posterior:  $F(1, 14) = 2.26$ ,  $p = .155$ , adj.  $\hat{\eta}_p^2 = .078$ ; medial vs.  
285 lateral:  $F(1, 14) = 2.70$ ,  $p = .123$ , adj.  $\hat{\eta}_p^2 = .101$ ; Fig 6D). This finding mirrors the small (though  
286 significant) differences in direction-tuning observed in individual M1 units at P8.

287 In summary, we found that M1 background activity increased sharply between P8 and P12, and  
288 that all population activity became more sparse and decorrelated across these ages. Also,  
289 population responses became less sensitive to movement amplitude at P12, and at the same time  
290 displayed a substantially different statistical distribution (i.e., normal versus exponential) in  
291 response to self-generated movements.

## 292 **Kinematic tuning is not mediated by spindle bursts**

293 Spindle bursts are brief thalamocortical oscillations (10–20 Hz; Fig 7A–B) that are thought to  
294 contribute to early cortical development [14,20–22]. Because spindle bursts are readily detectable  
295 at P8 but not P12 [23], they could potentially mediate the effect of twitch amplitude on M1 activity  
296 at that earlier age. Indeed, spindle bursts were more likely to occur during active sleep than during  
297 wake ( $t(7) = 2.94$ ,  $p = .022$ , adj.  $\hat{\eta}_p^2 = .489$ ; Fig 7C). However, whereas twitches and wake  
298 movements occurred at a rate of  $28.3 \pm 4.6 \text{ min}^{-1}$  and  $11.7 \pm 1.2 \text{ min}^{-1}$ , respectively, spindle bursts  
299 occurred at  $4.0 \pm 0.7 \text{ min}^{-1}$  during active sleep and  $2.5 \pm 0.4 \text{ min}^{-1}$  during wake. Consequently,  
300 only a small percentage of forelimb movements ( $10.0 \pm 1.4\%$ ) occurred within  $\pm 0.5$  s of a spindle  
301 burst.

302 We determined the response strength within individual M1 units triggered on forelimb movements  
303 that did *not* occur within  $\pm 0.5$  s of a spindle burst as a function of movement amplitude (Fig 7D)  
304 and movement direction (Fig 7E); response strength was largely unchanged compared with the  
305 earlier analyses for movement amplitude (Fig 3B) and movement direction (Fig 4C). M1 activity  
306 *across* units (population response) was similarly unaffected when triggered only on forelimb  
307 movements that did not occur within  $\pm 0.5$  s of a spindle burst (Fig 7F). All together, these findings  
308 indicate that the kinematic properties of M1 units observed at P8, and the shift in kinematic  
309 properties at P12, are not mediated by spindle bursts.

310

## 311 **Discussion**

312 Twitches are a distinct class of movement: They are brief and discrete, occur against a  
313 background of muscle atonia, and are highly diverse in their trajectories (i.e., amplitude and

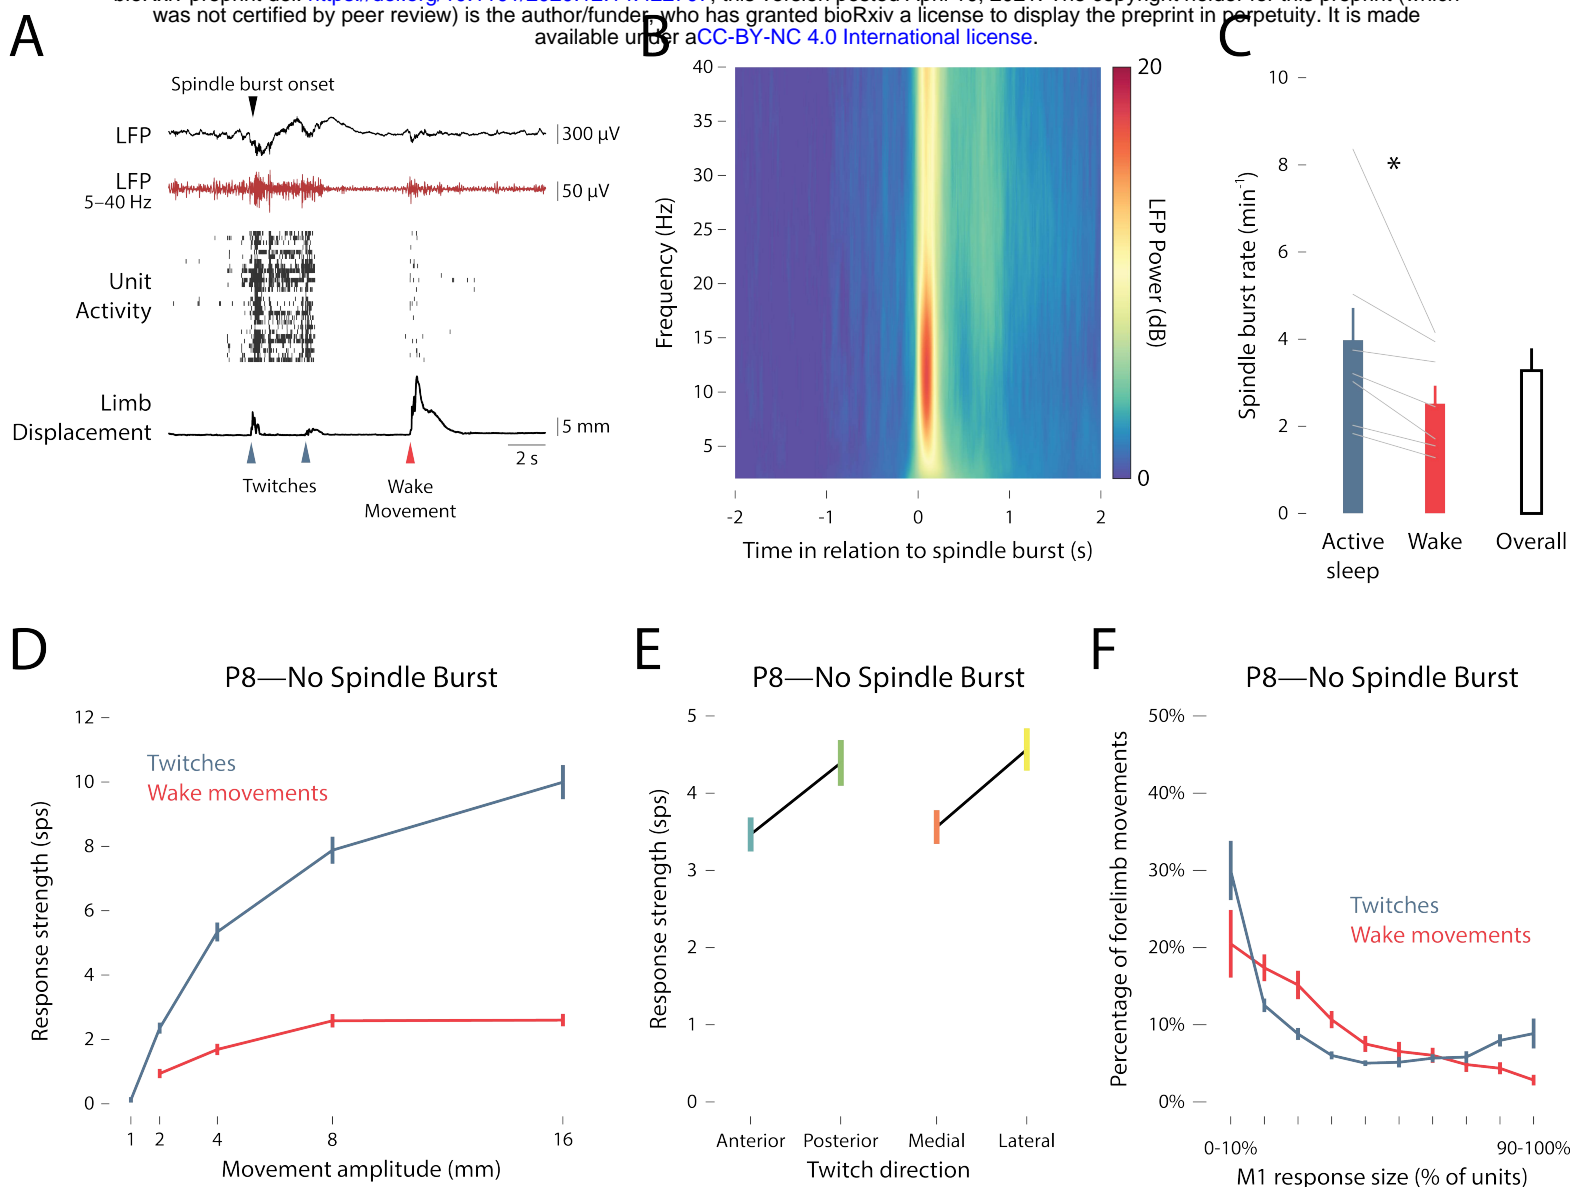

**Fig 7. Kinematic tuning is not mediated by spindle bursts.** (A) Representative data from a P8 rat. From top to bottom: A trace of the local field potential (LFP) in M1, including the onset of a spindle burst denoted with a black arrow; a filtered (5–40 Hz) LFP trace (red); unit activity in M1, with each row denoting a different unit and each vertical tick denoting an action potential; trace of forelimb displacement (black), with twitches and wake movements denoted by blue and red arrows, respectively. (B) Time-frequency spectrogram of LFP activity in M1, averaged across all P8 rats. The analysis was triggered on the onset of detected spindle bursts. (C) The rate of spindle bursts during active sleep (blue bar) and wake (red bar), as well as the overall rate (white bar) is shown for P8 rats. Gray lines show the values for individual pups. Asterisk denotes significance difference between sleep and wake ( $p < .05$ ). (D) Same as in Fig 3B, but triggered only on movements that did not occur within  $\pm 0.5$  s of a spindle burst. (E) Same as in Fig 4C, but triggered only on twitches that did not occur within  $\pm 0.5$  s of a spindle burst. (F) Same as in Fig 6B, but triggered only on movements that did not occur within  $\pm 0.5$  s of a spindle burst.

314 direction). As such, refference arising from twitches is well-suited to drive somatotopically  
315 precise activity in developing sensorimotor cortex. By contrast, wake movements are typically  
316 prolonged and complex, involving sustained activity within and across multiple limb muscles;  
317 consequently, refference arising from wake movements may be counterproductive to the  
318 development of precise forelimb somatotopy in sensorimotor cortex. These features of wake  
319 movements may help to explain why wake-related refference is initially gated by the external  
320 cuneate nucleus (ECN; [4,6]), a primary recipient of ascending proprioceptive feedback from the  
321 forelimbs [24].

322 Consistent with previous studies [25-27], we found that active sleep is the predominant behavioral  
323 state in P8 rats (see S2 Fig). We also found at this age that twitches occurred three times more  
324 frequently than did wake movements and that twitches drove significantly more M1 activity than  
325 did wake movements. The increased frequency of twitches and their enhanced ability to drive M1  
326 activity suggests that they play an important role in the development of M1's somatotopic map. In  
327 turn, given that the somatotopic map at P8 and P12 exhibits the same topography as the motor  
328 map that will begin to emerge two weeks later [7], we propose that the somatotopic map serves  
329 as a reference that will guide motor outflow to the correct efferent target.

### 330 **Kinematic tuning in developing M1**

331 We have demonstrated here in P8 rats that the processing of refference in M1 is sensitive to the  
332 kinematic features of twitches—especially twitch amplitude. This is the second such  
333 demonstration of rate-coding of movement amplitude in developing rodent cortex: In P5 rats, we  
334 similarly found that larger whisker twitches more strongly drive neural activity in S1 barrel cortex  
335 [14]. Although spontaneous activity also occurs in the developing retina [10,20] and cochlea [28],  
336 it is not known whether this activity produces rate-coded responses in visual and auditory cortex,  
337 respectively.

338 It is not clear whether M1 amplitude-coding indicates tuning to the forelimb's position in space *per*  
339 *se*, or simply tuning to the muscles that produce forelimb movements. For example, it is possible  
340 that larger forelimb movements tend to be produced by larger forelimb muscles (such as those at  
341 the shoulder), consequently triggering stronger refferent activation of M1. If this were the case,  
342 one might expect that individual units would respond selectively to twitches of either large or small  
343 muscles (and thus either large or small movements). On the contrary, we found at P8 that  
344 individual units were responsive across a *range* of movement amplitudes. This observation  
345 suggests that each unit is not tuned to a specific muscle, but rather to movement amplitude across  
346 the entire limb.

347 Interestingly, once refferent activity is conveyed to M1, it is modulated in a state-dependent  
348 manner that, again, resembles the state-dependent modulation found in S1 barrel cortex [14]. In  
349 fact, even though equally sized forelimb twitches and wake movements are presumably similar in  
350 terms of their patterns of forelimb muscle activation, twitches nonetheless produce substantially  
351 greater M1 activation (Fig 3B). This state-dependent amplitude tuning was particularly clear at  
352 the level of individual units: Of the 217 units recorded from at P8, 91% were tuned to twitch  
353 amplitude and 62% were tuned *exclusively* to twitch amplitude (data not shown).

354 At P8, nearly all M1 units were sensitive to twitch direction (see Fig 4). Assuming that twitches in  
355 different directions are caused by recruitment of different combinations of muscles, this finding  
356 suggests that M1 neurons at P8 are sensitive to the combination of forelimb muscles producing  
357 each twitch. However, EMG recordings of each forelimb muscle would be necessary to accurately  
358 assess the contributions of each muscle to M1 activity at this age. Notably, twitches with  
359 *uncommon* characteristics (e.g., large twitches, posterior/lateral twitches) produced the most unit  
360 activity, suggesting that neural activity in M1 is biased toward the detection of these twitches at  
361 P8. Thus, it may be that self-generated movements with relatively rare kinematic properties are

362 amplified so as to ensure their continued representation in the forelimb region of M1. This issue  
363 could be explored further by monitoring the development of M1 tuning parameters in response to  
364 experimental manipulation of twitch amplitude or direction.

365 We also found that the informational content provided to M1 by twitch reafference increased from  
366 P8 to P12. At P8, amplitude and direction tuning were uniformly distributed across M1 units: 91%  
367 of units were tuned to twitch amplitude (Fig 3E) and 70–73% of units were tuned to a single twitch  
368 direction (Fig 4E). Thus, when considering all units together, the kinematic information about  
369 twitches was represented redundantly within M1. Redundancy decreased by P12: The number of  
370 amplitude-tuned units decreased to just 17% of all units, and at most 49% of units were tuned to  
371 a single direction. This decrease in redundancy, along with the increased responses of M1 units  
372 to small twitches at P12 (S3B), indicates an increase in informational content provided by twitches  
373 at P12. Therefore, whereas the system at P8 seems to prioritize the detection of self-generated  
374 movements, the system at P12 seems to prioritize the most efficient and informative  
375 representation of those movements. Accordingly, P12 may represent the beginning of a new  
376 developmental phase in which reafferent activity in M1 becomes organized within more complex,  
377 sparse networks.

378 Finally, spindle bursts, a predominant thalamocortical oscillation in neonatal rats [14,20-22], were  
379 too infrequent at P8 to mediate the observed effects of movement amplitude and direction on M1  
380 activity (Fig 7C). Only 10% of forelimb movements coincided with spindle bursts, and exclusion  
381 of those movements from analysis did not alter the M1 response profiles (Fig 7D–F). Although  
382 one proposed role for spindle bursts is to strengthen developing thalamocortical circuitry  
383 [21,22,29], it is unclear how spindle bursts, compared with spiking activity alone, are contributing  
384 to this process at P8. However, because the rate of spindle bursts peaks during the first postnatal  
385 week and decreases thereafter [20,23,30], P8 may be beyond the age for properly identifying the  
386 functional contributions of spindle bursts to M1 development.

### 387 **Population activity in developing M1**

388 At P8, population-level activity in M1 is discontinuous, occurring primarily in discrete, correlated  
389 bursts of unit activity separated by periods of silence (Fig 5A). Neural activity in S1 [31,32] and  
390 primary visual cortex (V1; [33]) is similarly discontinuous at this age. It has been hypothesized  
391 that discontinuous activity helps to maximize the detection of spontaneous peripheral activity (see  
392 [34]), thereby aiding in the activity-dependent development of sensory networks [10-12].

393 At P12, however, correlated activity disappears as background activity, sparsity (a measure of  
394 the uniform distribution of action potentials), and entropy (a measure of informational capacity)  
395 increase. Such *sparsification* of cortical activity in M1 also occurs around P12 in S1 [31,32] and  
396 V1 [33]. Sparsification of cortical activity is timed contemporaneously with the sudden emergence  
397 of local cortical inhibition [4,35,36]. Moreover, recent modeling studies suggest that  
398 developmental changes to the balance of inhibitory and excitatory processes in cortex contribute  
399 to the sparsification of cortical activity at P12 [37,38]. Finally, given that inhibitory interneurons  
400 strongly modulate cortical sensory processing in adulthood [39,40], the development of inhibition  
401 in M1 may explain the developmental reduction in redundant tuning properties observed here at  
402 P12.

403 It is possible that the onset of sparsification in M1 depends on the prior development of M1's  
404 forelimb representation via sensory experience (i.e., reafference). Consequently, perturbing early  
405 sensory experience may disrupt the onset of sparsification in M1. Indeed, in neonatal mice, dark  
406 rearing (an example of sensory deprivation) delays sparsification in V1 by 2–3 days [33]; in  
407 contrast, whisker plucking in neonatal mice does not delay sparsification in S1 barrel cortex [31].  
408 Given such conflicting results, more work is needed to clarify the conditions under which cortical  
409 sparsification is affected by early sensory experience.



410 Surprisingly, the distribution of M1's population response to forelimb movements shifted from a  
411 roughly exponential to a roughly normal distribution over just four days (Fig 6B). This shift in  
412 response distributions meant that M1 at P12 was less likely to exhibit an all-or-none response to  
413 a forelimb movement and more likely to exhibit a response comprising approximately half of the  
414 M1 units. This absence of redundant population responses at P12 implies that forelimb  
415 movements provide more informational content to M1 at this age. This new phase in M1  
416 development in which reafferent input is more reliably detected and more informationally dense  
417 may serve to improve the effectiveness of M1's sensory map as a reference for its later-  
418 developing motor map.

419 The increase in variability in kinematic coding and robust changes to population-level activity  
420 shown here foreshadows M1 functioning in adulthood: Adult M1 neurons are exquisitely versatile  
421 and heterogenous, with each neuron able to simultaneously represent multiple kinematic (as well  
422 as temporal) features of movement in both Cartesian and body-centered reference frames [41-  
423 43]. M1's complexity in adulthood is partially supported by "sparse coding"—in which complex  
424 sensory input is reflected in precise, energetically efficient responses [44]. The transition to more  
425 complex sensory coding at P12, then, signifies an important transition toward the development of  
426 complex network properties, such as sparse coding, that will eventually enable M1 to produce  
427 complex movements and participate in motor learning [17,18].

428

## 429 **Methods**

### 430 **Resource Availability**

431 **Lead Contact.** Further information and requests for resources and code should be directed to,  
432 and will be fulfilled by, the lead contact, Dr. Mark Blumberg ([mark-blumberg@uiowa.edu](mailto:mark-blumberg@uiowa.edu)).

433 **Materials Availability.** This study did not generate new unique reagents.

434 **Data and Code Availability.** Raw data (action potential timestamps, behavioral event  
435 timestamps, and forelimb position time-series) will be made available upon request. Select  
436 custom MATLAB scripts used here can be found on Github (<https://www.github.com/XXXXX>).  
437 Additional scripts and data used will be made available upon request.

### 438 **Experimental Model and Subject Details**

439 Sprague-Dawley Norway rats (*Rattus norvegicus*) were used at P8–9 (n = 8, body weight: 18.8 ±  
440 0.4 g; hereafter referred to as P8) and P12–13 (n = 8, body weight: 30.6 ± 0.7 g; hereafter referred  
441 to as P12). Equal numbers of males and females were used and all subjects were selected from  
442 separate litters. In total, 37 single-units and 180 multi-units were isolated at P8 and 106 single-  
443 units and 144 multi-units were isolated at P12. In preliminary analyses, multi-units showed  
444 parsimonious results with single units and thus were included in all analyses (217 and 250  
445 combined units at P8 and P12, respectively).

446 Animals were housed in standard laboratory cages (48 × 20 × 26 cm) on a 12:12 light-dark cycle,  
447 with food and water available ad libitum. The day of birth was considered P0 and litters were  
448 culled to eight pups by P3. All experiments were conducted in accordance with the National  
449 Institutes of Health (NIH) Guide for the Care and Use of Laboratory Animals (NIH Publication No.  
450 80–23) and were approved by the Institutional Animal Care and Use Committee of the University  
451 of Iowa.

## 452 **Method Details**

453 **Surgery.** As described previously [4,45], a pup with a visible milk band was removed from the  
454 litter and anesthetized with isoflurane gas (3–5%; Phoenix Pharmaceuticals, Burlingame, CA). A  
455 custom-made bipolar hook electrode (0.002-inch diameter, epoxy coated; California Fine Wire,  
456 Grover Beach, CA) was inserted into the nuchal muscle for state determination. Carprofen (5  
457 mg/kg SC; Putney, Portland, ME) was administered as an anti-inflammatory analgesic. After  
458 removing the skin above the skull, an analgesic was applied topically (bupivacaine; Pfizer, New  
459 York, NY). The skull was dried with bleach. Vetbond (3M, Minneapolis, MN) was applied to the  
460 skin around the skull and a head-plate (Neurotar, Helsinki, Finland) was secured to the skull using  
461 cyanoacrylate adhesive.

462 A trephine drill bit (1.8 mm; Fine Science Tools, Foster City, CA) was used to drill a hole into the  
463 skull above the left forelimb representation of M1 (1.0 mm anterior to bregma, 2.2–2.5 mm lateral  
464 from the sagittal suture). Two smaller holes were drilled distally to the recording site for insertion  
465 of a thermocouple and reference/ground electrode. A small amount of peanut oil was applied over  
466 the recording site to prevent drying of the cortical tissue. Surgical procedures lasted approximately  
467 15 min.

468 The pup was then secured to a custom-made head-restraint apparatus inside a Faraday cage,  
469 with the animal's torso supported on a narrow platform. Brain temperature was monitored using  
470 a fine-wire thermocouple (Omega Engineering, Stamford, CT) distal to the M1 recording site. The  
471 pup was allowed to recover from anesthesia and acclimate for at least 1 h. The 1-h recording  
472 period did not begin until brain temperature was 36–37° C and the pup was cycling regularly  
473 between sleep and wake.

474 **Electrophysiological Recordings.** The nuchal EMG electrode was connected to a Lab Rat LR-  
475 10 acquisition system (Tucker Davis Technologies, Gainesville, FL). The EMG signal was  
476 sampled at approximately 1.5 kHz and high-pass filtered at 300 Hz.

477 A 16-channel silicon depth electrode (Model A4x4-3mm-100-125-177-A16; NeuroNexus, Ann  
478 Arbor, MI) was coated in fluorescent Dil (Vybrant Dil Cell-Labeling Solution; Life Technologies,  
479 Grand Island, NY) before insertion. The electrode was inserted 600–1000 µm into the forelimb  
480 representation of M1, angled 6° medially. A chlorinated Ag/Ag-Cl wire (0.25 mm diameter;  
481 Medwire, Mt. Vernon, NY) was inserted distal to the M1 recording site, serving as both a reference  
482 and a ground. The neural signal was sampled at approximately 25 kHz, with a high-pass (0.1 Hz)  
483 and a harmonic notch (60, 120, and 180 Hz) filter applied.

484 Electrode placement in the forelimb region of M1 was confirmed by manually stimulating the  
485 forelimb and observing exafferent neural activity. (Because forelimb stimulation also triggers  
486 activity in primary somatosensory cortex, histology was performed to further confirm electrode  
487 placement in M1; see below.) Neural activity from M1 was recorded for 1 h using SynapseLite  
488 (Tucker Davis Technologies) while the animal cycled between sleep and wake states.

489 **Video Collection.** In order to digitally reconstruct forelimb movements in three dimensions, video  
490 of the forelimb was recorded from front and side camera angles using two Blackfly-S cameras  
491 (FLIR Integrated Systems; Wilsonville, Oregon). Video was collected in SpinView (FLIR  
492 Integrated Systems) at 100 frames/s, with a 3000-µs exposure time and 720x540 pixel resolution.  
493 The two cameras were hardwired to acquire frames synchronously and were initiated using a  
494 common software trigger.

495 The synchronization of video and electrophysiological data was ensured by using an external  
496 time-locking stimulus. A red LED controlled by SynapseLite (Tucker Davis Technologies) was set  
497 to pulse every 3 s for a duration of 20 ms. The LED was positioned to be in view of both cameras.  
498 Each video was analyzed frame-by-frame with custom Matlab scripts to ensure an equal number

499 of frames between LED pulses. Although infrequent, when the number of frames between pulses  
500 was less than expected, the video was adjusted by duplicating and inserting one adjacent frame  
501 at that timepoint so as to preserve timing across the recording. Thus, all videos were ensured to  
502 be time-locked to the electrophysiological data within 10 ms.

503 **Histology.** At the end of the recording period, the pup was euthanized with ketamine/xylazine  
504 (10:1; >0.08 mg/kg) and perfused with 0.1 M phosphate-buffered saline, followed by 4%  
505 paraformaldehyde. The brain was extracted and post-fixed in 4% paraformaldehyde for at least  
506 24 h and was transferred to a 30% sucrose solution 24–48 h prior to sectioning.

507 In order to confirm the electrode's location within the forelimb representation of M1, the left cortical  
508 hemisphere was dissected from the subcortical tissue and flattened between two glass slides  
509 (separated using two pennies) for 5–10 min. Small weights (10 g) applied light pressure to the top  
510 glass slide. The flattened cortex was sectioned tangentially to the pial surface. A freezing  
511 microtome (Leica Microsystems, Buffalo Grove, IL) was used to section the cortex (80- $\mu$ m  
512 sections). Free-floating sections were imaged at 2.5x using a fluorescent microscope and digital  
513 camera (Leica Microsystems) to mark the location of the Dil.

514 Electrode placement in the forelimb region of M1 was confirmed by staining cortical sections for  
515 cytochrome oxidase (CO), which reliably delineates the divisions of primary sensory cortex at this  
516 age [46]. The M1 forelimb representation is immediately medial to (and partially overlaps) the  
517 primary sensory forelimb representation (see Fig 1B–C). Cytochrome C (0.3 mg/mL; Sigma-  
518 Aldrich), catalase (0.2 mg/mL; Sigma-Aldrich), and 3,3'-diaminobenzidine tetrahydrochloride  
519 (DAB; 0.5 mg/mL; Spectrum, Henderson, NV) were dissolved in a 1:1 dilution of 0.1 M phosphate  
520 buffer and distilled water. Sections were developed in 24-well plates on a shaker (35–40°C, 100  
521 rpm) for 3–6 h, rinsed in phosphate-buffered saline, and mounted on a glass slide. The stained  
522 sections were imaged at 2.5x or 5x magnification and composited with the fluorescent image to  
523 confirm the electrode tract within the forelimb region of M1.

524 **Behavioral State and Forelimb Movements.** As described previously [3,4], nuchal EMG and  
525 behavior were used to assess behavioral state (the experimenter was blind to the  
526 neurophysiological record while scoring behavior). The wake state was defined by the presence  
527 of high-amplitude movements of the limbs against a background of high nuchal muscle tone.  
528 Active sleep was defined by the presence of discrete myoclonic twitches of the face, limbs, and  
529 tail against a background of nuchal muscle atonia.

530 Forelimb movements were quantified using DeepLabCut (DLC), a markerless tracking solution  
531 that uses a convolutional neural network to track features (e.g., limbs) of animals in a laboratory  
532 setting [15,16]. At least 200 manually labeled frames (tracking the wrist of the right forelimb) were  
533 used to initially train the network. After the initial training, newly analyzed frames with marker  
534 estimates that were deemed inaccurate were re-labeled and used to re-train the neural network  
535 until satisfactory tracking was achieved. Separate neural networks were trained for the front-  
536 facing and side-facing camera angles. The networks reached a training root mean square error  
537 (RMSE) of 0.18 and 0.19 mm and a test RMSE of 0.28 and 0.42 mm, respectively.

538 Forelimb twitches and wake movements were identified using custom Matlab scripts. Although  
539 infrequent ( $0.5 \pm 0.1\%$  of frames), individual frames in which the wrist position was associated  
540 with a low confidence value ( $<.80$ , identified by DLC) were removed and linearly interpolated from  
541 the position data of adjacent frames. Forelimb position data was derived to obtain forelimb  
542 velocity, and forelimb twitches and wake movements were detected by peak detection of forelimb  
543 velocities reaching 2x the standard deviation of quiet periods for twitches, and 3x the standard  
544 deviation of the quiet period for wake movements. All movements were required to be preceded  
545 by a 250-ms period of quiescence in the forelimb. Every forelimb twitch and wake movement was  
546 visually confirmed by the experimenter to identify and discard false positives.

547 For the analysis of movement amplitude, the forelimb position was summed across the x-, y-, and  
548 z-dimensions using the Pythagorean theorem (Fig 2A). The peak amplitude was measured as the  
549 difference between the point of maximum displacement (using a shared time point for each  
550 dimension) and the median baseline position from -0.5 to 0 s before the initiation of a twitch or  
551 wake movement. Because twitch amplitude follows an exponential distribution (see Fig 2B),  
552 movements were sorted into logarithmic bins of 0–1, 1–2, 2–4, 4–8, and 8–16 mm.

553 For the analysis of movement direction, the forelimb position was transformed into polar  
554 coordinates along the rostral-caudal and medial-lateral axes (see Fig 2C). Movements were  
555 sorted into anterior-posterior or medial-lateral bins. Because wake movements occur during  
556 sustained bouts of continuous activity and regularly involve multi-directional trajectories, they  
557 could not be analyzed for direction-tuning in M1.

558 **Spindle Bursts.** As described previously [14], the neural signal was band-pass filtered at 5–40  
559 Hz with a stopband attenuation of -60 dB and a 1-Hz transition gap. A Hilbert transformation was  
560 applied to the filtered waveform, and spindle burst onset was defined as the first point at which  
561 the waveform amplitude exceeded the median plus two standard deviations. Spindle bursts were  
562 defined as having a minimum duration of 150 ms.

563 **Spike Sorting.** SynapseLite files were converted to binary files using custom Matlab scripts and  
564 sorted with Kilosort [47]. Briefly, the 16 channels of neural data were whitened (covariance-  
565 standardized) and band-pass filtered (300–5000 Hz) before spike detection. Next, template  
566 matching was implemented to sort the event waveforms into clusters. The first-pass spike  
567 detection threshold was set to 6 standard deviations below the mean and the second-pass  
568 threshold was set to 5 standard deviations below the mean. The minimum allowable firing rate  
569 was set to 0.01 sps and the bin size for template detection set to 656,000 sample points for P8  
570 animals and 262,400 sample points for P12 animals (approximately 27 s and 11 s, respectively).  
571 All other Kilosort parameters were left at their default values.

572 Clusters were visualized and sorted in Phy2 [48]. Putative single units (elsewhere referred to as  
573 “single-units”) were defined as having (1) spike waveforms that reliably fit within a well-isolated  
574 waveform template, (2) a distribution along seven principal components that was absent of clear  
575 outliers, and (3) an auto-correlogram with a decreased firing rate at time-lag 0 (indicative of a  
576 single-unit’s refractory period).

577 Clusters meeting the first two criteria but not the third were considered multi-units. Any cluster  
578 with a waveform template indicative of electrical noise, a significantly low firing rate (< 0.01 sps),  
579 or amplitude drift across the recording period was discarded.

580 **Data Shuffling.** Two shuffling procedures were used to approximate the null hypotheses in (1)  
581 kinematic analyses and (2) population-activity analyses. First, for all kinematic analyses (i.e.,  
582 those performed in Fig 3, 4, and 6C–D), twitches and wake movements were randomly selected  
583 in proportion to the number of movements used in the main analysis. 100 analyses were  
584 performed using randomly selected forelimb movements and the 99% confidence interval was  
585 computed to approximate the distribution of the null hypothesis. For example, in Fig 3B, twitches  
586 were randomly selected (i.e., amplitude was ignored, but direction was controlled for) and  
587 analyzed 100 times and the 99% confidence interval was taken to obtain the shuffled data.

588 Second, for all population-activity analyses (i.e., those performed in Fig 5 and 6B), the inter-spike  
589 intervals of each spike train were resampled and used to create shuffled spike trains. This  
590 procedure conserves each unit’s overall firing rate and temporal dynamics [49,50]. Analyses using  
591 the resampled spike trains were repeated 100 times and the 99% confidence interval computed  
592 to obtain the shuffled data.

593 **Population Analyses.** The onset of movement periods was defined as the onset of twitches and  
594 wake movements described above. The offset of each movement period was defined as the time-  
595 point 250 ms after the displacement of the forelimb returned below the threshold for detection  
596 (described above) for the first time. Therefore, each movement period was followed by 250 ms to  
597 account for refference arising from each movement. The onset of non-movement periods was  
598 defined as the offset of movement periods, and therefore were preceded by 250 ms of quiescence  
599 in the limb. The offset of the non-movement periods was defined as the initiation of the next  
600 movement. All non-movement periods less than 250 ms and all periods that overlapped were  
601 discarded from analysis (<2% of the duration of any recording).

602 Sparsity was defined according to [51]

$$603 \quad S = \left( \frac{\sum_{i=1}^n r_i}{n} \right)^2 / \frac{\sum_{i=1}^n r_i^2}{n} \quad (1)$$

604 where  $n$  represents the number of forelimb movements of a given pup and  $r_i$  represents the firing  
605 rate of a given unit from 0–250 ms after the  $i$ th forelimb movement.

606 Entropy (of a discrete random variable) was defined according to [52]

$$607 \quad H = \sum_{x=1}^n p(x) * \log_2 \left( \frac{1}{p(x)} \right) \quad (2)$$

608 where  $n$  represents the number of possible states for a unit (based on its firing rate) and  $p(x)$   
609 represents the probability distribution of a given unit in that state. Firing-rate data were discretized  
610 according to procedures outlined in [53]. Briefly, a unit's firing rate was calculated in 250-ms time  
611 windows, and each window was assigned to one of three possible states based on a uniform-  
612 width binning of the firing rate distribution.

613 For correlation analyses, movement and non-movement periods were broken down into 250-ms  
614 time windows and a Pearson correlation coefficient of the firing rate was computed across time  
615 windows for every possible unit-unit pair. All Pearson coefficients for an animal were averaged  
616 together before comparison between P8 and P12.

617 *Population response* was defined as the percentage of all units of a given pup that were  
618 “responsive” to a given forelimb movement. A unit was considered responsive if its firing rate  
619 significantly increased (i.e., above the 95% confidence interval of baseline firing rate) after a  
620 forelimb movement; otherwise, a unit was considered unresponsive.

## 621 **Quantification and Statistical Analysis**

622 **Statistical Analysis.** All data were tested for normality using the Shapiro-Wilk test, for equal  
623 variance using Levene's test (for between-subjects variables), and for sphericity using Mauchly's  
624 test (for within-subjects variables with >2 groups) prior to analysis. In analyses in which the  
625 variance between groups was not equal, a pooled error term was not used when generating  
626 simple main effects and post-hoc tests. In analyses in which sphericity was violated, a Huynh-  
627 Feldt correction was applied to the degrees of freedom. Probabilities and  $r^2$  values were arc-sin  
628 transformed prior to analysis. The mean and standard error of the mean (SEM) are used  
629 throughout as measures of central tendency and dispersion, respectively.

630 All analyses were performed as independent t tests, or two- or three-way mixed design ANOVAs.  
631 Throughout the Results section, simple main effects were only reported if the interaction term was  
632 significant. All main effects, interactions, simple main effects, and the results of any additional  
633 statistical tests can be found in S4 Table.

634 In all two- and three-way ANOVAs, an adjusted partial eta-squared was used as an estimate of  
635 effect size that corrects for positive bias due to sampling variability [54]. For all t tests and one-  
636 way ANOVAs, an adjusted eta-squared estimate of effect size was reported.

637

638

639

## 640 **Acknowledgments**

641 This research was supported by a grant from the National Institute of Child Health and Human  
642 Development (R37-HD081168) to M.S.B.

643

## 644 **Author Contributions**

645 Conceptualization, R.M.G., J.C.D, G.S., and M.S.B.; Methodology, R.M.G., J.C.D, G.S., and  
646 M.S.B.; Software, R.M.G. and J.C.D.; Validation, R.M.G.; Formal Analysis, R.M.G.; Investigation,  
647 R.M.G.; Resources, G.S. and M.S.B.; Data Curation, R.M.G.; Writing - Original Draft, R.M.G.;  
648 Writing—Reviewing and Editing, R.M.G., J.C.D., G.S., and M.S.B.; Visualization, R.M.G. and  
649 M.S.B.; Supervision, G.S. and M.S.B.; Project Administration, G.S. and M.S.B.; Funding  
650 Acquisition, G.S. and M.S.B.

## 651 **Declaration of Interests**

652 The authors declare no competing interests.

653

654

655

## 656 **References**

657 1. Hatsopoulos, N. G., & Suminski, A. J. (2011). Sensing with the motor cortex. *Neuron*, *72*, 477-  
658 487.

659 2. Omrani, M., Murnaghan, C. D., Pruszynski, J. A., & Scott, S. H. (2016). Distributed task-specific  
660 processing of somatosensory feedback for voluntary motor control. *eLife*, *5*, e13141.

661 3. Tiriac, A., Del Rio-Bermudez, C., & Blumberg, M. S. (2014). Self-generated movements with  
662 "unexpected" sensory consequences. *Current Biology*, *24*, 2136-2141.

663 4. Dooley, J. C., & Blumberg, M. S. (2018). Developmental 'awakening' of primary motor cortex  
664 to the sensory consequences of movement. *eLife*, *7*, e41841.

665 5. Chakrabarty, S., & Martin, J. H. (2000). Postnatal development of the motor representation in  
666 primary motor cortex. *Journal of neurophysiology*, *84*, 2582-2594.

667 6. Tiriac, A., & Blumberg, M. S. (2016). Gating of reafference in the external cuneate nucleus  
668 during self-generated movements in wake but not sleep. *eLife*, *5*, e18749.

669 7. Singleton, A. C., Brown, A. R., & Teskey, G. C. (2021). Development and plasticity of complex  
670 movement representations. *Journal of neurophysiology*.

671 8. Del Rio-Bermudez, C., Sokoloff, G., & Blumberg, M. S. (2015). Sensorimotor processing in the  
672 newborn rat red nucleus during active sleep. *Journal of Neuroscience*, *35*, 8322-8332.

- 673 9. Mukherjee, D., Sokoloff, G., & Blumberg, M. S. (2018). Corollary discharge in precerebellar  
674 nuclei of sleeping infant rats. *eLife*, 7, e38213.
- 675 10. Ackman, J. B., Burbridge, T. J., & Crair, M. C. (2012). Retinal waves coordinate patterned  
676 activity throughout the developing visual system. *Nature*, 490, 219-225.
- 677 11. Katz, L. C., & Shatz, C. J. (1996). Synaptic activity and the construction of cortical circuits.  
678 *Science*, 274, 1133-1138.
- 679 12. Blankenship, A. G., & Feller, M. B. (2010). Mechanisms underlying spontaneous patterned  
680 activity in developing neural circuits. *Nature Reviews Neuroscience*, 11, 18-29.
- 681 13. Ashe, J., & Georgopoulos, A. P. (1994). Movement parameters and neural activity in motor  
682 cortex and area 5. *Cerebral Cortex*, 4, 590-600.
- 683 14. Dooley, J. C., Glanz, R. M., Sokoloff, G., & Blumberg, M. S. (2020). Self-generated whisker  
684 movements drive state-dependent sensory input to developing barrel cortex. *Current Biology*, 30,  
685 2404-2410.
- 686 15. Mathis, A., Mamidanna, P., Cury, K. M., Abe, T., Murthy, V. N., Mathis, M. W., & Bethge, M.  
687 (2018). DeepLabCut: markerless pose estimation of user-defined body parts with deep learning.  
688 *Nat Neurosci*, 21, 1281-1289.
- 689 16. Nath, T., Mathis, A., Chen, A. C., Patel, A., Bethge, M., & Mathis, M. W. (2019). Using  
690 DeepLabCut for 3D markerless pose estimation across species and behaviors. *Nature Protocols*,  
691 14, 2152-2176.
- 692 17. Heindorf, M., Arber, S., & Keller, G. B. (2018). Mouse motor cortex coordinates the behavioral  
693 response to unpredicted sensory feedback. *Neuron*, 99, 1040-1054.
- 694 18. Kawai, R., Markman, T., Poddar, R., Ko, R., Fantana, A. L., Dhawale, A. K., Kampff, A. R., &  
695 Ölveczky, B. P. (2015). Motor cortex is required for learning but not for executing a motor skill.  
696 *Neuron*, 86, 800-812.
- 697 19. Barranca, V. J., Kovačič, G., Zhou, D., & Cai, D. (2014). Sparsity and compressed coding in  
698 sensory systems. *PLoS Computational Biology*, 10, e1003793.
- 699 20. Hanganu, I. L., Ben-Ari, Y., & Khazipov, R. (2006). Retinal waves trigger spindle bursts in the  
700 neonatal rat visual cortex. *Journal of Neuroscience*, 26, 6728-6736.
- 701 21. Tolner, E. A., Sheikh, A., Yukin, A. Y., Kaila, K., & Kanold, P. O. (2012). Subplate neurons  
702 promote spindle bursts and thalamocortical patterning in the neonatal rat somatosensory cortex.  
703 *Journal of Neuroscience*, 32, 692-702.
- 704 22. Yang, J.-W., An, S., Sun, J.-J., Reyes-Puerta, V., Kindler, J., Berger, T., Kilb, W., & Luhmann,  
705 H. J. (2013). Thalamic network oscillations synchronize ontogenetic columns in the newborn rat  
706 barrel cortex. *Cerebral Cortex*, 23, 1299-1316.
- 707 23. Shen, J., & Colonnese, M. T. (2016). Development of activity in the mouse visual cortex.  
708 *Journal of Neuroscience*, 36, 12259-12275.
- 709 24. Campbell, S. K., Parker, T., & Welker, W. (1974). Somatotopic organization of the external  
710 cuneate nucleus in albino rats. *Brain Research*, 77, 1-23.
- 711 25. Jouvet-Mounier, D., Astic, L., & Lacote, D. (1969). Ontogenesis of the states of sleep in rat,  
712 cat, and guinea pig during the first postnatal month. *Developmental psychobiology*, 2, 216-239.
- 713 26. Seelke, A. M., & Blumberg, M. S. (2008). The microstructure of active and quiet sleep as  
714 cortical delta activity emerges in infant rats. *Sleep*, 31, 691-699.

- 715 27. Blumberg, M. S., Gall, A. J., & Todd, W. D. (2014). The development of sleep–wake rhythms  
716 and the search for elemental circuits in the infant brain. *Behavioral neuroscience*, *128*, 250-263.
- 717 28. Tritsch, N. X., Yi, E., Gale, J. E., Glowatzki, E., & Bergles, D. E. (2007). The origin of  
718 spontaneous activity in the developing auditory system. *Nature*, *450*, 50-55.
- 719 29. Murata, Y., & Colonnese, M. T. (2016). An excitatory cortical feedback loop gates retinal wave  
720 transmission in rodent thalamus. *eLife*, *5*, e18816.
- 721 30. Yang, J.-W., Hanganu-Opatz, I. L., Sun, J.-J., & Luhmann, H. J. (2009). Three patterns of  
722 oscillatory activity differentially synchronize developing neocortical networks in vivo. *Journal of*  
723 *Neuroscience*, *29*, 9011-9025.
- 724 31. Golshani, P., Goncalves, J. T., Khoshkhou, S., Mostany, R., Smirnakis, S., & Portera-Cailliau,  
725 C. (2009). Internally mediated developmental desynchronization of neocortical network activity.  
726 *Journal of Neuroscience*, *29*, 10890-10899.
- 727 32. van der Bourg, A., Yang, J.-W., Reyes-Puerta, V., Laurency, B., Wieckhorst, M., Stüttgen,  
728 M. C., Luhmann, H. J., & Helmchen, F. (2017). Layer-specific refinement of sensory coding in  
729 developing mouse barrel cortex. *Cerebral Cortex*, *27*, 4835-4850.
- 730 33. Rochefort, N. L., Garaschuk, O., Milos, R.-I., Narushima, M., Marandi, N., Pichler, B.,  
731 Kovalchuk, Y., & Konnerth, A. (2009). Sparsification of neuronal activity in the visual cortex at  
732 eye-opening. *Proceedings of the National Academy of Sciences*, *106*, 15049-15054.
- 733 34. Colonnese, M. T., & Phillips, M. A. (2018). Thalamocortical function in developing sensory  
734 circuits. *Current opinion in neurobiology*, *52*, 72-79.
- 735 35. Ben-Ari, Y., Gaiarsa, J.-L., Tyzio, R., & Khazipov, R. (2007). GABA: a pioneer transmitter that  
736 excites immature neurons and generates primitive oscillations. *Physiological Reviews*, *87*, 1215-  
737 1284.
- 738 36. Colonnese, M. T. (2014). Rapid developmental emergence of stable depolarization during  
739 wakefulness by inhibitory balancing of cortical network excitability. *Journal of Neuroscience*, *34*,  
740 5477-5485.
- 741 37. Romagnoni, A., Colonnese, M. T., Touboul, J. D., & Gutkin, B. S. (2020). Progressive  
742 alignment of inhibitory and excitatory delay may drive a rapid developmental switch in cortical  
743 network dynamics. *Journal of neurophysiology*, *123*, 1583-1599.
- 744 38. Rahmati, V., Kirmse, K., Holthoff, K., Schwabe, L., & Kiebel, S. J. (2017). Developmental  
745 emergence of sparse coding: A dynamic systems approach. *Scientific reports*, *7*, 1-13.
- 746 39. Wood, K. C., Blackwell, J. M., & Geffen, M. N. (2017). Cortical inhibitory interneurons control  
747 sensory processing. *Current opinion in neurobiology*, *46*, 200-207.
- 748 40. Azim, E., & Seki, K. (2019). Gain control in the sensorimotor system. *Current Opinion in*  
749 *Physiology*, *8*, 177-187.
- 750 41. Hatsopoulos, N. G., Xu, Q., & Amit, Y. (2007). Encoding of movement fragments in the motor  
751 cortex. *Journal of Neuroscience*, *27*, 5105-5114.
- 752 42. Wu, W., & Hatsopoulos, N. (2006). Evidence against a single coordinate system  
753 representation in the motor cortex. *Experimental Brain Research*, *175*, 197-210.
- 754 43. Churchland, M. M., & Shenoy, K. V. (2007). Temporal complexity and heterogeneity of single-  
755 neuron activity in premotor and motor cortex. *Journal of neurophysiology*, *97*, 4235-4257.
- 756 44. Olshausen, B. A., & Field, D. J. (2004). Sparse coding of sensory inputs. *Current opinion in*  
757 *neurobiology*, *14*, 481-487.



- 758 45. Blumberg, M. S., Sokoloff, G., Tiriac, A., & Del Rio-Bermudez, C. (2015). A valuable and  
759 promising method for recording brain activity in behaving newborn rodents. *Developmental*  
760 *psychobiology*, 57, 506-517.
- 761 46. Seelke, A. M., Dooley, J. C., & Krubitzer, L. A. (2012). The emergence of somatotopic maps  
762 of the body in S1 in rats: the correspondence between functional and anatomical organization.  
763 *PLoS One*, 7, e32322.
- 764 47. Pachitariu, M., Steinmetz, N., Kadir, S., Carandini, M., & Harris, K. D. (2016). Kilosort: realtime  
765 spike-sorting for extracellular electrophysiology with hundreds of channels. *bioRxiv*, 061481.
- 766 48. Rossant, C., & Harris, K. D. (2013). Hardware-accelerated interactive data visualization for  
767 neuroscience in Python. *Frontiers in Neuroinformatics*, 7, 36.
- 768 49. Rivlin-Etzion, M., Ritov, Y. a., Heimer, G., Bergman, H., & Bar-Gad, I. (2006). Local shuffling  
769 of spike trains boosts the accuracy of spike train spectral analysis. *Journal of neurophysiology*,  
770 95, 3245-3256.
- 771 50. Perkel, D. H., Gerstein, G. L., & Moore, G. P. (1967). Neuronal spike trains and stochastic  
772 point processes: I. The single spike train. *Biophysical Journal*, 7, 391-418.
- 773 51. Rolls, E. T., & Tovee, M. J. (1995). Sparseness of the neuronal representation of stimuli in  
774 the primate temporal visual cortex. *Journal of neurophysiology*, 73, 713-726.
- 775 52. Shannon, C. E. (1948). A mathematical theory of communication. *The Bell System Technical*  
776 *Journal*, 27, 379-423.
- 777 53. Timme, N. M., & Lapish, C. (2018). A tutorial for information theory in neuroscience. *eNeuro*,  
778 5, e0052.
- 779 54. Mordkoff, J. T. (2019). A simple method for removing bias from a popular measure of  
780 standardized effect size: Adjusted partial eta squared. *Advances in Methods and Practices in*  
781 *Psychological Science*, 2, 228-232.

**A**

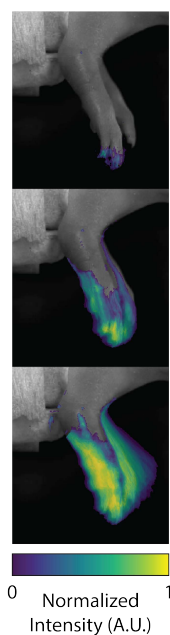

Small-amplitude twitches (0–1 mm)

Medium-amplitude twitches (2–4 mm)

Large-amplitude twitches (8–16 mm)

**B**

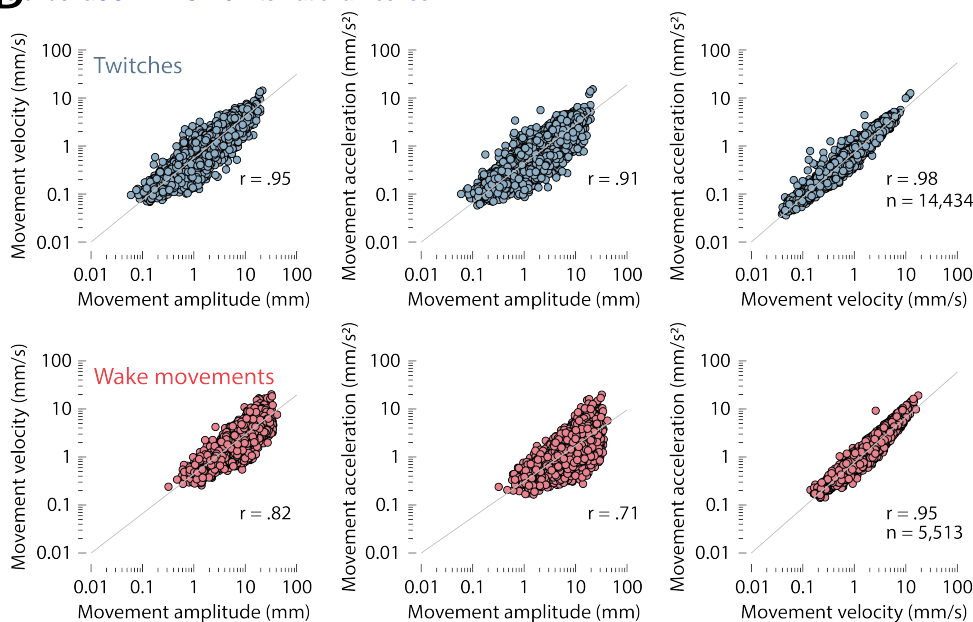

**C**

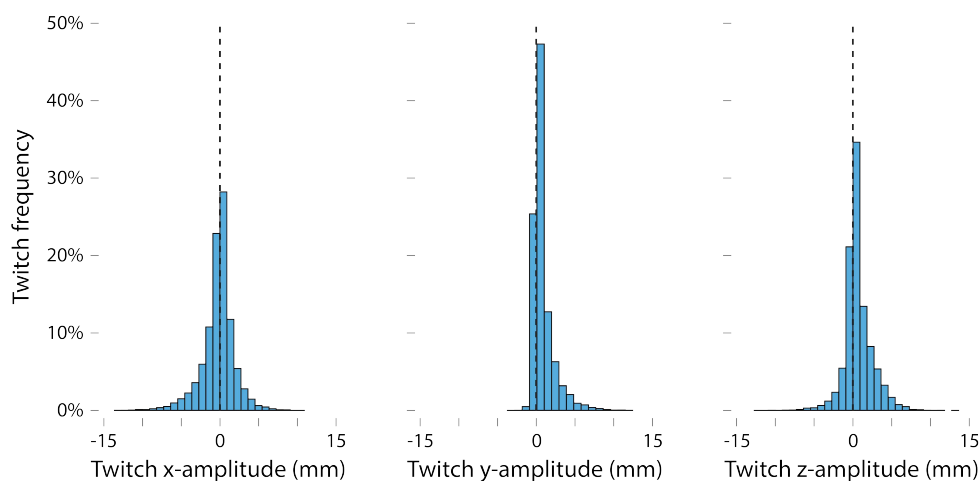

**D**

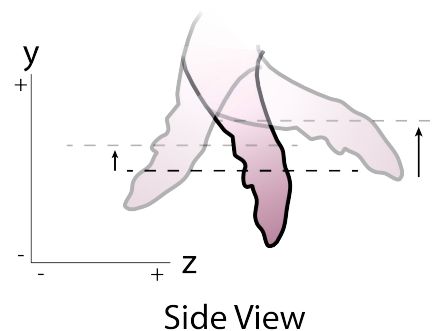

**S1 Fig. Additional kinematic data for forelimb movements.** (A) The average change in pixel intensity within the region-of-interest across 50 small-amplitude (top), medium-amplitude (middle), and large-amplitude (bottom) twitches is shown as a heatmap. Smaller twitches primarily reflect displacement of the digits and larger twitches typically reflect displacement of the digits, wrist, and elbow. (B) Bivariate correlations for all twitches (top row) and wake movements (bottom row) for movement velocity vs. movement amplitude (left column), movement acceleration vs. movement amplitude (center column), and movement acceleration vs. movement velocity (right column). In each plot, movements are pooled across age. All  $r$  values are significant at  $p < .05$ . (C) Relative frequency histograms depict the displacement of twitches (data from P8 and P12 rats combined) along the x- (left), y- (center), and z- (right) dimensions. Note the asymmetrical distribution of twitches in the positive y-dimension, which prompted the exclusion of this dimension from further direction analyses. (D) Side view of right-forelimb movements to show how pendular motion produces only a positive y-displacement.

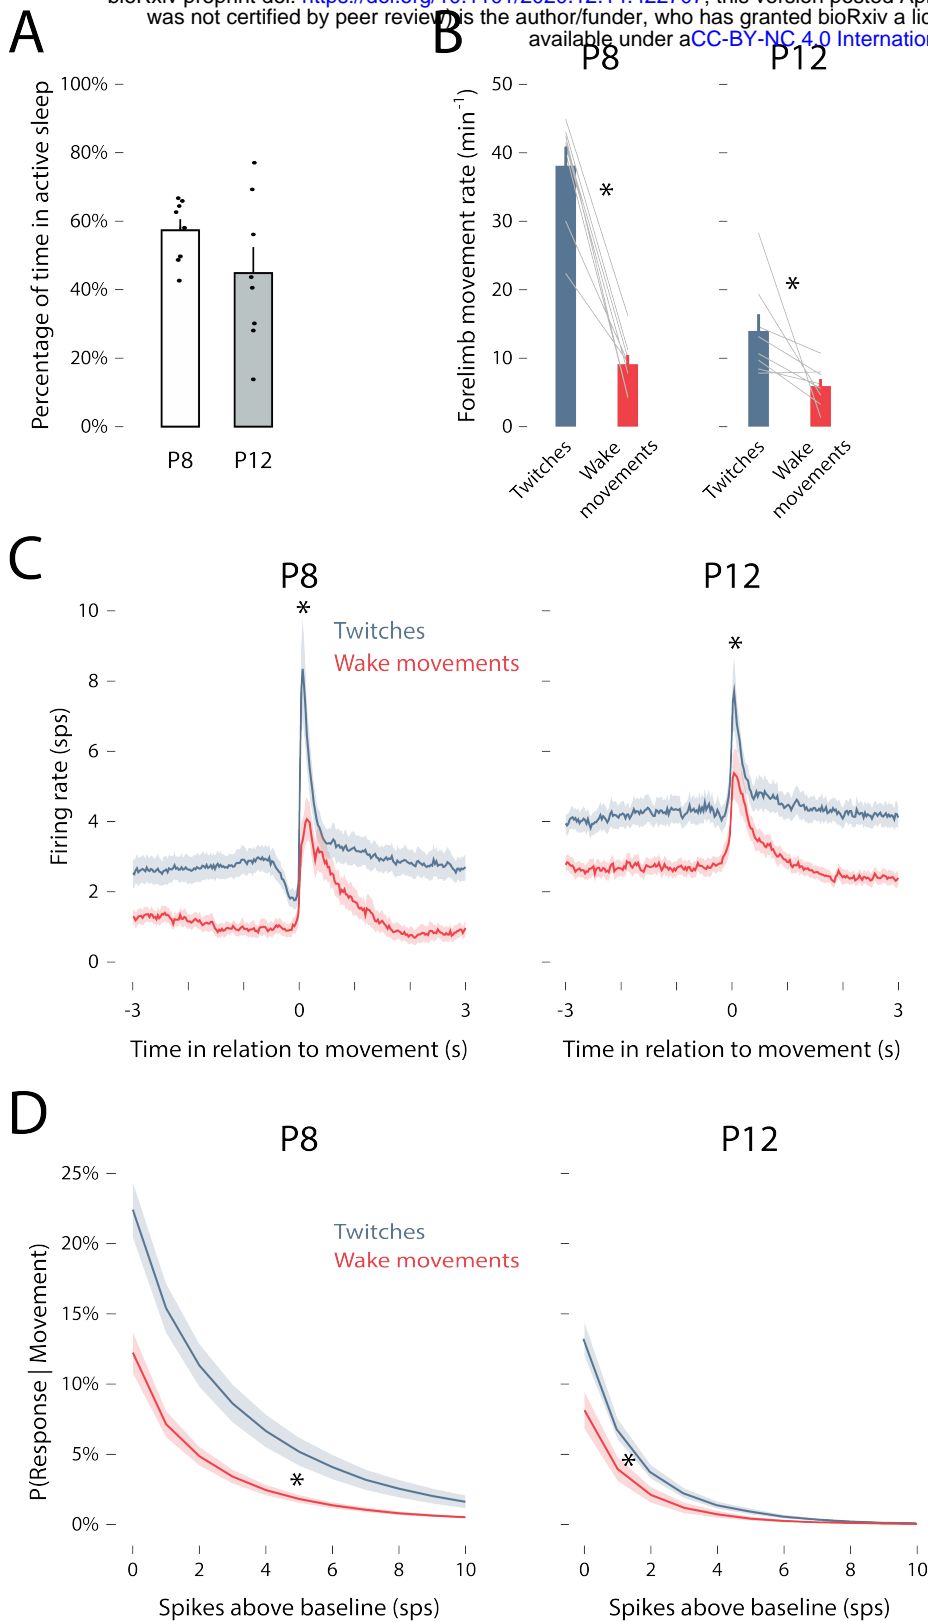

**S2 Fig. Twitch and wake movements trigger reafferent responses in M1.** (A) Mean ( $\pm$ SEM) percentage of time spent in active sleep at P8 (white) and P12 (gray). Black dots show values for individual pups. (B) Mean ( $\pm$ SEM) rate of forelimb movements for twitches during active sleep (blue) and movements during wake (red) at P8 (left) and P12 (right). Gray lines show values for individual pups. Asterisks denote significant difference between twitches and wake movements ( $p < .05$ ). (C) Peristimulus time histograms of mean firing rate of M1 units in relation to twitches (blue) and wake movements (red) at P8 (left) and P12 (right). Asterisks denote significant difference between responses to twitches and wake movements ( $p < .05$ ). (D) Mean ( $\pm$ SEM) probability of an M1 response (individual unit) given a twitch (blue) or wake movement (red) as a function of spiking threshold (i.e., firing rate above that unit's baseline firing rate). Higher spiking thresholds yield smaller response probabilities. Asterisks denote significant difference between twitches and wake movements ( $p < .05$ ).

**A**

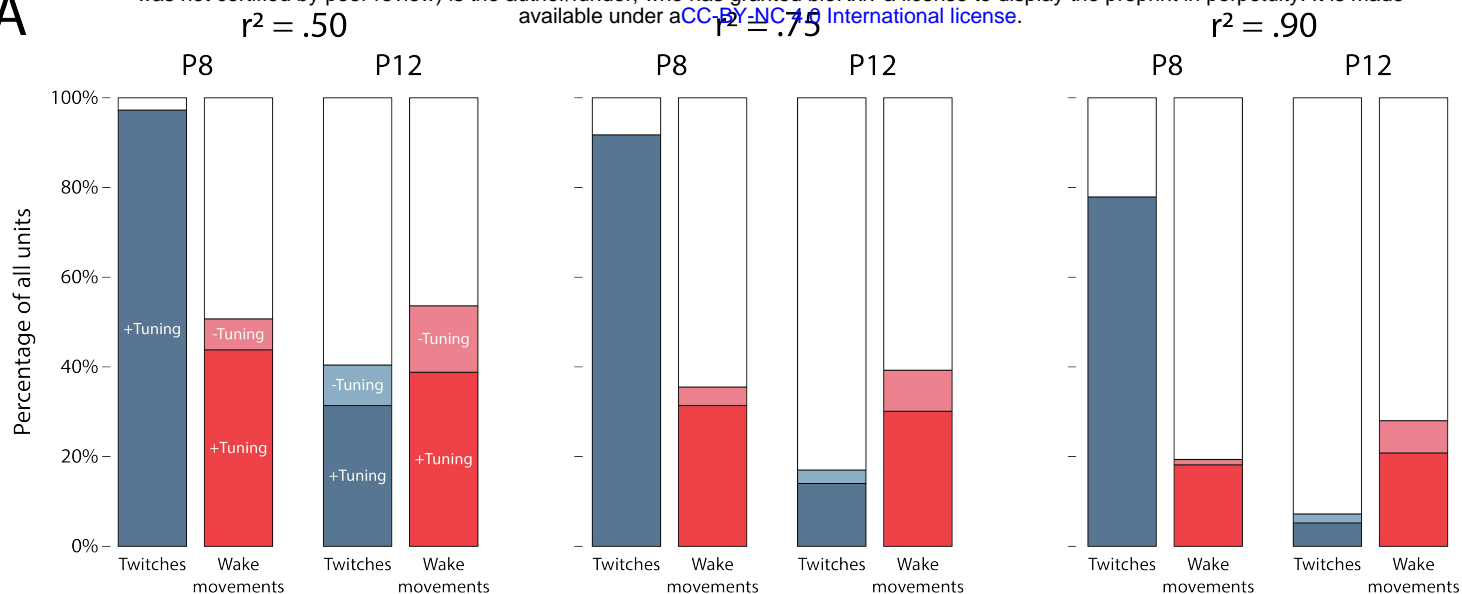

**B**

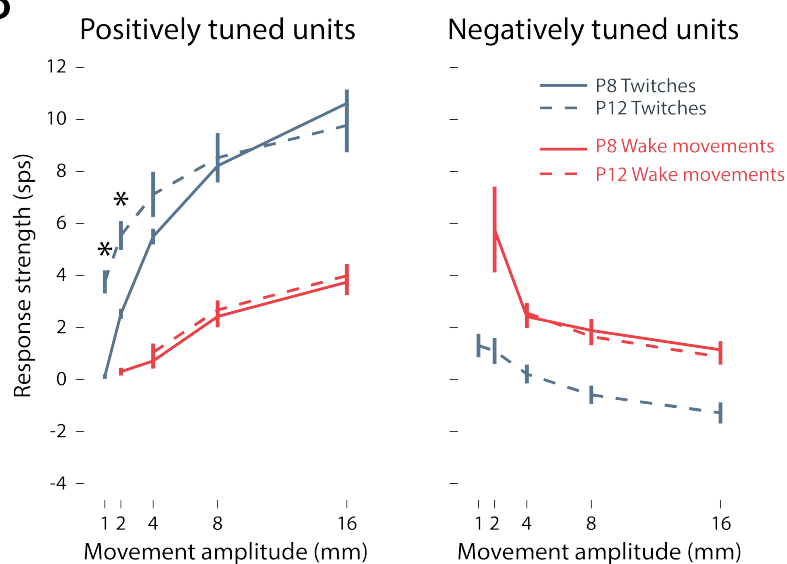

**C**

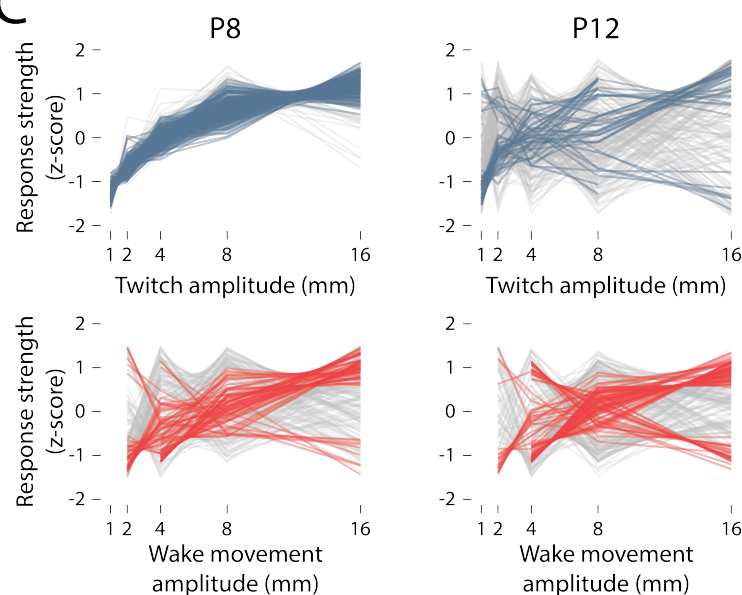

**S3 Fig. Additional aspects of the relationship between movement amplitude and M1 unit responses.** (A) As in Fig 3E, the percentage of units that are positively tuned to movement amplitude for twitches (dark blue) and wake movements (dark red), negatively tuned for twitches (light blue) and wake movements (light red), or not tuned (white). From left to right, two  $r^2$  thresholds are shown below (.50) and above (.90) the threshold of .75 used in Fig 3E. (B) As in Fig 3B, mean ( $\pm$ SEM) response strength is shown as a function of movement amplitude. Solid and dashed blue lines denote P8 and P12 twitches, respectively; solid and dashed red lines denote P8 and P12 wake movements, respectively. Positively and negatively tuned units were identified using an  $r^2$  threshold of .75. Asterisks indicate significant difference between P8 and P12 ( $p < .05$ ). (C) As in Fig 3B, change in response strength ( $\Delta$ firing rate in relation to baseline, z-scored) is shown for individual M1 units in response to twitches (blue) and wake movements (red) at P8 and P12. Positively and negatively tuned units are indicated in blue (twitches) and red (wake movements); untuned units are indicated in gray.

## S4 Table

### Fig 3B

\*Note: The slope of each individual unit (shown in Figure 3D) was compared across groups rather than each level of movement amplitude. This was done to circumvent missing data when animals did not produce enough movements of a given amplitude).

State (Main Effect):  $F(1, 465) = 209.40, p < .001, \text{adj. } \hat{\eta}_p^2 = .309$

Age (Main Effect):  $F(1, 465) = 127.83, p < .001, \text{adj. } \hat{\eta}_p^2 = .214$

State x Age (Interaction):  $F(1, 465) = 190.57, p < .001, \text{adj. } \hat{\eta}_p^2 = .289$

State | P8 (Simple Main Effect):  $F(1, 216) = 250.27, p < .001, \text{adj. } \hat{\eta}^2 = .535$

State | P12 (Simple Main Effect):  $F(1, 249) = 0.42, p = .520, \text{adj. } \hat{\eta}^2 < .001$

### Fig 4C

#### Anterior vs. Posterior

Direction (Main Effect):  $F(1, 465) = 16.45, p < .001, \text{adj. } \hat{\eta}_p^2 = .032$

Age (Main Effect):  $F(1, 465) = 17.84, p < .001, \text{adj. } \hat{\eta}_p^2 = .035$

Direction x Age (Interaction):  $F(1, 465) = 60.37, p < .001, \text{adj. } \hat{\eta}_p^2 = .113$

Direction | P8 (Simple Main Effect):  $F(1, 216) = 51.05, p < .001, \text{adj. } \hat{\eta}^2 = .187$

Direction | P12 (Simple Main Effect):  $F(1, 249) = 9.80, p = .002, \text{adj. } \hat{\eta}^2 = .034$

#### Medial vs. Lateral

Direction (Main Effect):  $F(1, 465) = 43.04, p < .001, \text{adj. } \hat{\eta}_p^2 = .083$

Age (Main Effect):  $F(1, 465) = 19.47, p < .001, \text{adj. } \hat{\eta}_p^2 = .038$

Direction x Age (Interaction):  $F(1, 465) = 35.59, p < .001, \text{adj. } \hat{\eta}_p^2 = .069$

Direction | P8 (Simple Main Effect):  $F(1, 216) = 53.75, p < .001, \text{adj. } \hat{\eta}^2 = .195$

Direction | P12 (Simple Main Effect):  $F(1, 249) = 0.28, p = .599, \text{adj. } \hat{\eta}^2 < .001$

### Fig 5C

#### Movement-related activity

State (Main Effect):  $F(1, 14) = 53.97, p < .001, \text{adj. } \hat{\eta}_p^2 = .779$

Age (Main Effect):  $F(1, 14) = 0.22, p = .644, \text{adj. } \hat{\eta}_p^2 < .001$

State x Age (Interaction):  $F(1, 14) = 2.24, p = .157, \text{adj. } \hat{\eta}_p^2 = .076$

#### Background activity

State (Main Effect):  $F(1, 14) = 47.31, p < .001, \text{adj. } \hat{\eta}_p^2 = .756$

Age (Main Effect):  $F(1, 14) = 39.21, p < .001, \text{adj. } \hat{\eta}_p^2 = .718$

State x Age (Interaction):  $F(1, 14) = 2.37, p = .146, \text{adj. } \hat{\eta}_p^2 = .084$

### Fig 5D

$t(10.89) = 5.97, p < .001, \text{adj. } \hat{\eta}^2 = .744$

## Fig 5E

$t(14) = 4.71, p < .001, \text{adj. } \hat{\eta}^2 = .585$

## Fig 5G

### Movement-related activity

State (Main Effect):  $F(1, 14) = 28.02, p < .001, \text{adj. } \hat{\eta}_p^2 = .643$

Age (Main Effect):  $F(1, 14) = 91.97, p < .001, \text{adj. } \hat{\eta}_p^2 = .859$

State x Age (Interaction):  $F(1, 14) = 1.00, p = .334, \text{adj. } \hat{\eta}_p^2 < .001$

### Background activity

State (Main Effect):  $F(1, 14) = 3.65, p = .077, \text{adj. } \hat{\eta}_p^2 = .150$

Age (Main Effect):  $F(1, 14) = 53.41, p < .001, \text{adj. } \hat{\eta}_p^2 = .777$

State x Age (Interaction):  $F(1, 14) = 1.94, p = .186, \text{adj. } \hat{\eta}_p^2 = .058$

## Fig 6B

Units (Main Effect):  $F(3.51, 49.15) = 24.18, p < .001, \text{adj. } \hat{\eta}_p^2 = .607$

State (Main Effect):  $F(1, 14) = 13.30, p = .003, \text{adj. } \hat{\eta}_p^2 = .450$

Age (Main Effect):  $F(1, 14) = 6.26, p = .025, \text{adj. } \hat{\eta}_p^2 = .260$

Units x State (Interaction):  $F(3.02, 42.26) = 7.11, p = .001, \text{adj. } \hat{\eta}_p^2 = .290$

Units x Age (Interaction):  $F(3.51, 49.15) = 26.93, p = .162, \text{adj. } \hat{\eta}_p^2 = .607$

State x Age (Interaction):  $F(1, 14) = 4.63, p = .049, \text{adj. } \hat{\eta}_p^2 = .194$

Units | P8 (Simple Main Effect):  $F(9, 126) = 18.77, p < .001, \text{adj. } \hat{\eta}^2 = .543$

Units | P12 (Simple Main Effect):  $F(9, 126) = 32.35, p < .001, \text{adj. } \hat{\eta}^2 = .678$

## Fig 6B extended

\*Note: Shapiro-Wilk test for each P8 and P12 rat (state differences are averaged).

P8:  $p = .001, p = .068, p = .030, p = .007, p < .001, p = .187, p < .001, p = .004$

P12:  $p = .315, p = .577, p = .464, p = .631, p = .155, p = .936, p = .724, p = .781$

## Fig 6C

State (Main Effect):  $F(1, 14) = 1.39, p = .267, \text{adj. } \hat{\eta}_p^2 = .022$

Age (Main Effect):  $F(1, 14) = 19.39, p = .001, \text{adj. } \hat{\eta}_p^2 = .551$

State x Age (Interaction):  $F(1, 14) = 30.08, p < .001, \text{adj. } \hat{\eta}_p^2 = .659$

State | P8 (Simple Main Effect):  $F(1, 7) = 22.06, p < .001, \text{adj. } \hat{\eta}^2 = .571$

State | P12 (Simple Main Effect):  $F(1, 7) = 9.37, p = .008, \text{adj. } \hat{\eta}^2 = .357$

## Fig 6D

### Anterior vs. Posterior

Direction (Main Effect):  $F(1, 14) = 0.20, p = .665, \text{adj. } \hat{\eta}_p^2 < .001$

Age (Main Effect):  $F(1, 14) = 3.44, p = .085, \text{adj. } \hat{\eta}_p^2 = .140$

Direction x Age (Interaction):  $F(1, 14) = 2.26, p = .155, \text{adj. } \hat{\eta}_p^2 = .078$

## Medial vs. Lateral

Direction (Main Effect):  $F(1, 14) = 2.27, p = .154, \text{adj. } \hat{\eta}_p^2 = .078$

Age (Main Effect):  $F(1, 14) = 3.06, p = .102, \text{adj. } \hat{\eta}_p^2 = .120$

Direction x Age (Interaction):  $F(1, 14) = 2.70, p = .123, \text{adj. } \hat{\eta}_p^2 = .101$

### **Fig 7B**

$t(7) = 2.94, p = .022, \text{adj. } \hat{\eta}^2 = .489$

### **S1A Fig**

Twitch amplitude v. velocity:  $r(11358) = .95, p < .001$

Twitch amplitude v. acceleration:  $r(11358) = .91, p < .001$

Twitch velocity v. acceleration:  $r(11358) = .98, p < .001$

Wake amplitude v. velocity:  $r(5511) = .82, p < .001$

Wake amplitude v. acceleration:  $r(5511) = .71, p < .001$

Wake velocity v. acceleration:  $r(5511) = .95, p < .001$

### **S2A Fig**

$t(14) = 1.51, p = .153, \text{adj. } \hat{\eta}^2 = .140$

### **S2B Fig**

State (Main Effect):  $F(1, 14) = 75.17, p < .001, \text{adj. } \hat{\eta}_p^2 = .832$

Age (Main Effect):  $F(1, 14) = 51.15, p < .001, \text{adj. } \hat{\eta}_p^2 = .770$

State x Age (Interaction):  $F(1, 14) = 24.01, p < .001, \text{adj. } \hat{\eta}_p^2 = .606$

State | P8 (Simple Main Effect):  $F(1, 7) = 92.08, p < .001, \text{adj. } \hat{\eta}^2 = .859$

State | P12 (Simple Main Effect):  $F(1, 7) = 7.11, p = .018, \text{adj. } \hat{\eta}^2 = .289$

### **S2C Fig**

State (Main Effect):  $F(1, 14) = 30.16, p < .001, \text{adj. } \hat{\eta}_p^2 = .660$

Age (Main Effect):  $F(1, 14) = 0.97, p = .342, \text{adj. } \hat{\eta}_p^2 < .001$

State x Age (Interaction):  $F(1, 14) = 2.63, p = .127, \text{adj. } \hat{\eta}_p^2 = .098$

### **S2D Fig**

State (Main Effect):  $F(1, 14) = 31.37, p < .001, \text{adj. } \hat{\eta}_p^2 = .669$

Age (Main Effect):  $F(1, 14) = 18.60, p = .001, \text{adj. } \hat{\eta}_p^2 = .540$

State x Age (Interaction):  $F(1, 14) = 10.47, p = .006, \text{adj. } \hat{\eta}_p^2 = .387$

State | P8 (Simple Main Effect):  $F(1, 7) = 21.25, p = .002, \text{adj. } \hat{\eta}^2 = .717$

State | P12 (Simple Main Effect):  $F(1, 7) = 17.21, p = .004, \text{adj. } \hat{\eta}^2 = .670$

### **S3B Fig**

\*Note: Due to missing cells (explained above), an omnibus test was not performed. A mixed 2-way ANOVA was performed on the factors of Age and Twitch Amplitude for positively tuned units only.

Twitch Amplitude (Main Effect):  $F(1.31, 291.02) = 104.92, p < .001, \text{adj. } \hat{\eta}_p^2 = .318$

Age (Main Effect):  $F(1, 222) = 1.52, p = .219, \text{adj. } \hat{\eta}_p^2 = .003$

Twitch Amplitude x Age (Interaction):  $F(1.31, 291.02) = 10.01, p = .001, \text{adj. } \hat{\eta}_p^2 = .039$

Age | 0–1 mm (Simple Main Effect):  $t(25.38) = 6.43, p < .001, \text{adj. } \hat{\eta}^2 = .605$

Age | 1–2 mm (Simple Main Effect):  $t(222) = 4.63, p < .001, \text{adj. } \hat{\eta}^2 = .084$

Age | 2–4 mm (Simple Main Effect):  $t(222) = 0.82, p = .416, \text{adj. } \hat{\eta}^2 < .001$

Age | 4–8 mm (Simple Main Effect):  $t(222) = 0.61, p = .541, \text{adj. } \hat{\eta}^2 < .001$

Age | 8–16 mm (Simple Main Effect):  $t(222) = 0.53, p = .594, \text{adj. } \hat{\eta}^2 < .001$
